# A multi-component, community-based strategy to facilitate COVID-19 vaccine uptake among Latinx populations: from theory to practice

**AUTHORS:** Carina Marquez<sup>1\*</sup>, Andrew D. Kerkhoff<sup>1</sup>, Jamie Naso<sup>2</sup>, Maria G. Contreras<sup>2,3</sup>, Edgar Castellanos<sup>2,4</sup>, Susana Rojas<sup>5</sup>, James Peng<sup>1</sup>, Luis Rubio<sup>1</sup>, Diane Jones<sup>2</sup>, Jon Jacobo<sup>5</sup>, Susy Rojas<sup>5</sup>, Rafael Gonzalez<sup>6</sup>, Jonathan D. Fuchs<sup>6</sup>, Douglas Black<sup>1</sup>, Salustiano Ribeiro<sup>7</sup>, Jen Nossokoff<sup>7</sup>, Valerie Tulier-Laiwa<sup>3</sup>, Jacqueline Martinez<sup>2</sup>, Gabriel Chamie<sup>1</sup>, Genay Pilarowski<sup>8</sup>, Joseph DeRisi<sup>9,10</sup>, Maya Petersen<sup>11</sup>, Diane V. Havlir<sup>1</sup>

## Affiliations:

<sup>1</sup>Division of HIV, Infectious Diseases and Global Medicine, Zuckerberg San Francisco General Hospital and Trauma Center, University of California San Francisco

<sup>2</sup>Unidos en Salud, San Francisco, CA, USA

<sup>3</sup>Department of Medicine, University of California, San Francisco, CA, USA

<sup>4</sup>Department of Radiology and Biomedical Imaging, University of California San Francisco, San Francisco, California, USA

<sup>5</sup>The San Francisco Latino Task Force on COVID-19, San Francisco, CA, USA

<sup>6</sup>San Francisco Department of Public Health, San Francisco, California, USA

<sup>7</sup>Bay Area Phlebotomy and Laboratory Services (BayPLS), San Francisco, CA, USA

<sup>8</sup>Department of Pathology, Stanford University, Stanford, California, USA

<sup>9</sup>Chan Zuckerberg Biohub, San Francisco, California, USA

<sup>10</sup>Department of Biochemistry and Biophysics, University of California San Francisco, San Francisco, California, USA

<sup>11</sup>Division of Epidemiology and Biostatistics, School of Public Health, University of California, Berkeley, Berkeley, CA, USA

## Corresponding author:

\*Carina.Marquez@ucsf.edu

## Abstract

### 1 **Background**

2 COVID-19 vaccine coverage in the Latinx community depends on delivery systems that  
3 overcome barriers such as institutional distrust, misinformation, and access to care. We  
4 hypothesized that a community-centered vaccination strategy that included mobilization,  
5 vaccination, and “activation” components could successfully reach an underserved Latinx  
6 population, utilizing its social networks to boost vaccination coverage.

### 7 **Methods and Findings**

8 Our community-academic-public health partnership, “Unidos en Salud,” utilized a theory-  
9 informed approach to design our “Motivate, Vaccinate, and Activate” COVID-19 vaccination  
10 strategy. Our strategy’s design was guided by the PRECEDE Model and sought to address  
11 and overcome predisposing, enabling, and reinforcing barriers to COVID-19 vaccination faced  
12 by Latinx individuals in San Francisco. We evaluated our prototype outdoor, “neighborhood”  
13 vaccination program located in a central commercial and transport hub in the Mission District in  
14 San Francisco, using the Reach, Effectiveness, Adoption, Implementation and Maintenance  
15 (RE-AIM) framework during a 16-week period from February 1, 2021 to May 19, 2021.  
16 Programmatic data, city-wide COVID-19 surveillance data, and a survey conducted between  
17 May 2, 2021 and May 19, 2021 among 997 vaccinated clients  $\geq 16$  years old were used in the  
18 evaluation.

19 There were 20,792 COVID-19 vaccinations administered at the neighborhood site during the  
20 16-week evaluation period. Vaccine recipients had a median age of 43 (IQR 32-56) years,  
21 53.9% were male and 70.5% were Latinx, 14.1% white, 7.7% Asian, 2.4% Black, and 5.3%  
22 other. Latinx vaccinated clients were substantially more likely than non-Latinx clients to have  
23 an annual household income of less than \$50,000 a year (76.1% vs. 33.5%), be a first-  
24 generation immigrant (60.2% vs. 30.1%), not have health insurance (47.3% vs. 16.0%), and  
25 not have access to primary care provider (62.4% vs. 36.2%). The most frequently reported  
26 reasons for choosing vaccination at the site were its neighborhood location (28.6%), easy and  
27 convenient scheduling (26.9%) and recommendation by someone they trusted (18.1%);

28 approximately 99% reported having an overall positive experience, regardless of ethnicity.  
29 Notably, 58.3% of clients reported that they were able to get vaccinated earlier because of the  
30 neighborhood vaccination site, 98.4% of clients completed both vaccine doses, and 90.7%  
31 said that they were more likely to recommend COVID-19 vaccination to family and friends after  
32 their experience; these findings did not substantially differ according to ethnicity. There were  
33 40.3% of vaccinated clients who said they still knew at least one unvaccinated person (64.6%  
34 knew  $\geq 3$ ). Among clients who received both vaccine doses (n=729), 91.0% said that after their  
35 vaccination experience, they had personally reached out to at least one unvaccinated person  
36 they knew (61.6% reached out to  $\geq 3$ ) to recommend getting vaccinated; 83.0% of clients  
37 reported that one or more friends, and/or family members got vaccinated as a result of their  
38 outreach, including 18.9% who reported 6 or more persons got vaccinated as a result of their  
39 influence.

#### 40 **Conclusions**

41 A multi-component, “Motivate, Vaccinate, and Activate” community-based strategy addressing  
42 barriers to COVID-19 vaccination for the Latinx population reached the intended population,  
43 and vaccinated individuals served as ambassadors to recruit other friends and family members  
44 to get vaccinated.

## 45 **Introduction**

46 COVID-19 has disproportionately affected underserved communities of color, including Latinx  
47 in the United States, further amplifying long-standing health disparities [1–4]. The highly safe  
48 and effective COVID-19 vaccines are the most critical tool in our public health strategy to  
49 overcome the COVID-19 pandemic. The success of our public health vaccination strategy  
50 relies on our ability to rapidly reach the population at highest risks of COVID-19, including  
51 communities of color which have been subject to decades of inequities and often have the  
52 least access to health care, including vaccination [5,6].

53

54 There is a growing understanding of the barriers to vaccination communities of color face in  
55 the United States. In California where Latinx persons account for approximately 40% of the  
56 total population and 63% of COVID-19 cases to date, they have only received 27% of all  
57 COVID-19 vaccinations administered statewide [7,8]. Some of the barriers to COVID-19  
58 vaccine uptake include a lack of trust in health systems stemming from historical experience,  
59 structural racism, inaccurate and insufficient information, and structural barriers to vaccine  
60 access [2,9–11]. There are few formal evaluations of vaccination strategies that can overcome  
61 these barriers, and none for COVID-19 vaccines.

62

63 We hypothesized that a community-centered, culturally-tailored, theory-informed vaccination  
64 strategy that included mobilization, vaccination and “activation” components could successfully  
65 reach an underserved Latinx population, utilizing its social networks to boost vaccination  
66 coverage. We developed this multifaceted approach via a community-academic-public health  
67 partnership founded in April, 2020 to increase SARS-COV-2 testing and public health  
68 surveillance in the Mission neighborhood in San Francisco. In this paper we describe the  
69 “Motivate, Vaccinate, and Activate” vaccination program and evaluate the program according  
70 to the Reach, Effectiveness, Adoption, Implementation and Maintenance (RE-AIM) framework  
71 [12] during a 16-week period from February 1 and May 19<sup>th</sup> 2021.

## 72 **Methods**

73

### 74 **Setting**

75 The Unidos en Salud (UeS) neighborhood vaccination program was implemented in the  
76 Mission District, home to a large Latinx and immigrant community in San Francisco, California  
77 [13]. The Mission Neighborhood comprises a large majority of the 94110 zip code, which has  
78 an estimated population of 72,380 persons (62,452  $\geq$ 16 years old) of whom 33.4% identify as  
79 Latinx, 43.8% white, 14.7% Asian and 3.3% Black [14]. The neighborhood is economically  
80 heterogenous; the median household income is \$134,592 per year, yet 22.6% of households  
81 have a combined income less than \$50,000. The Mission District is an important cultural and  
82 commercial hub for Latinx people living throughout the many neighborhoods of San  
83 Francisco's Southeast sector, which have consistently had the highest rates of COVID-19  
84 throughout the pandemic (**Supplementary Figure 1**), concentrated among low-income, front  
85 line workers, unable to work from home [1,15]. UeS has offered free walk-up, COVID-19  
86 testing in the Mission District since April, 2020.

87

### 88 **Ethics**

89 The study was conducted under a public health surveillance program reviewed by UCSF  
90 Committee on Human Research. Survey participants provided consent in their preferred  
91 language prior to survey initiation.

92

### 93 **Community-academic-public health partnership model**

94 Unidos en Salud ("United in Health", UeS) is a community-academic-public health partnership  
95 founded in April 2020 to respond to and support the Latinx community in San Francisco during  
96 the COVID-19 pandemic. The partnership provides ongoing SARS-CoV-2 testing and  
97 surveillance [1,15–18]. The partnership includes the San Francisco Latino Task Force on  
98 COVID-19 (LTF), the University of California, San Francisco (UCSF), the University of  
99 California, Berkeley, the Chan Zuckerberg Biohub, locally owned Bay Area Phlebotomy and  
100 Laboratory Services (BayPLS), Primary.Health, and the San Francisco Department of Public  
101 Health (SFDPH). The LTF is a group made up of members and leaders from more than three  
102 dozen Latinx, community-based organizations, many of which are long-standing, that was

103 forged during the COVID-19 pandemic [19]. Primary. Health informatics was founded in 2020 to  
104 meet community based COVID-19 testing efforts and provides cloud-based support for  
105 COVID-19 testing and vaccination registration and data metric tracking. BayPLS has bilingual  
106 staff that have provided community testing and vaccination services in the San Francisco Bay  
107 Area since the beginning of the COVID-19 pandemic. UeS operates via joint decision making  
108 by leaders from each of the partners and academic institution faculty that occur at weekly  
109 meetings. Funding for the vaccination program was provided by a combination of the SFPDPH,  
110 UCSF, private donors and the Chan-Zuckerberg Initiative.

111

## 112 **Overview and design of a strategy to reach and increase COVID-** 113 **19 vaccination among Latinx individuals**

114 For our vaccine strategy prototype, we utilized a theory-informed approach to design a  
115 multicomponent, implementation strategy that addressed barriers to COVID-19 vaccination  
116 faced by Latinx and other community members (**Table 1**). We specifically sought to reach  
117 those community members for whom the City’s high volume vaccination sites posed barriers  
118 such as a lack of transportation and “institutional mistrust.” We built upon lessons learned  
119 providing community-based COVID-19 services to socioeconomically vulnerable individuals  
120 [13–15], including providing free walk-up SARS-CoV-2 testing, with support for persons testing  
121 positive, to over 30,000 persons since April 2020. Formative findings from this work were used  
122 to design our “Motivate, Vaccinate, and Activate” strategy (**Figure 1**). The “Motivate,  
123 Vaccinate, and Activate” strategy’s design was guided by the PRECEDE Model [20] and  
124 therefore sought to address and overcome predisposing, enabling and reinforcing barriers to  
125 COVID-19 vaccination faced by Latinx and other low-income community members in San  
126 Francisco (**Table 1**). The “Motivate, Vaccinate, and Activate” strategy represents a culturally-  
127 tailored, multicomponent implementation strategy to optimize reach and uptake of COVID-19  
128 vaccination among Latinx individuals in San Francisco. Further details for each strategy  
129 component are provided below and are summarized in **Table 1**.

130

### 131 **“Motivate, Vaccinate, and Activate” strategy components**

#### 132 **Community mobilization and demand generation activities (“Motivate”)**



133 We used several methods to inform community members about COVID-19 vaccination and its  
134 benefits, raise awareness about COVID-19 vaccine eligibility and the UeS neighborhood  
135 vaccination site, and ultimately increase motivation and demand for COVID-19 vaccination  
136 (**Table 1**). Responses to a survey on vaccine attitudes and preferences from community  
137 members seeking COVID-19 testing at our site in January 2021 were used to inform training of  
138 our community workers and informational materials on vaccination [9]. Vaccine efficacy, short-  
139 and long-term side effects of vaccines, and conspiracy theories on motivation behind vaccine  
140 development were some of the key topics of concern that were directly addressed through  
141 educational and outreach efforts

142 UeS community workers performed direct community outreach in the Mission District,  
143 via door-to-door household canvassing with flyers and by speaking to business owners in the  
144 commercial corridor of the Mission. We also emphasized to elder care facilities the opportunity  
145 and rationale to vaccinate high-risk adults. The LTF reached out to their multiple CBO's and  
146 network of community organization to push out invitations to priority groups such as community  
147 health workers as they became eligible; this guaranteed that we were reaching our key  
148 populations who didn't necessarily have access to the mass media advertising of vaccination  
149 appointments. Additionally, automated text messages (and reminder texts) were sent to 26,206  
150 unique phone numbers of community members who had previously been tested for COVID-19  
151 at a UeS site as soon as they became eligible for vaccination and invited them to get  
152 vaccinated at the UeS neighborhood site. Furthermore, flyers and posters were posted  
153 throughout the community (**Figure 2a**), and UeS members undertook Spanish radio,  
154 newspaper and television interviews to feature the UeS neighborhood vaccination site.  
155 Community leaders vaccinated at the site posted photos on social media (Facebook, TikTok),  
156 encouraging others to get vaccinated. Additionally, to engage community members who trust  
157 physicians but do not have access to one, we hosted Sunday 'cafecitos' directly across from  
158 the vaccination site, where community members could walk up and ask Latinx physicians  
159 questions while enjoying free pan dulce and coffee.

## 160 . 161 **A client-centered neighborhood vaccination site ("Vaccinate")**

### 162 **Neighborhood vaccination site characteristics**

163 The UeS neighborhood vaccination site was the first of 8 community-led sites established in  
164 partnership with the SFDPH to increase equitable distribution of vaccines to neighborhoods  
165 disproportionately affected by COVID-19. The site was located outdoors and was located in a  
166 small parking lot (approximately 8,800 square feet), behind a McDonald's restaurant at 24<sup>th</sup>  
167 and Capp Street (**Figure 2b**). The vaccination site was across the street from the free, walk-up  
168 UeS COVID-19 testing site, located at a busy public plaza and transport hub – the intersection  
169 of both above ground bus/streetcar system (MUNI) and underground subway system (BART)  
170 (**Figure 2c**). This location was intentionally chosen in order to enhance visibility and promote  
171 walk-up scheduling as people exited public transit and walked through the neighborhood. The  
172 site was open 4 days a week (Sunday through Wednesday) between the hours of 9am and  
173 4pm. It was designed to be open in order to improve flow, and had several semi-permanent  
174 tents corresponding to different aspects of the vaccination process (i.e., check-in, pre-  
175 vaccination waiting area, vaccination area, and post-vaccination waiting area) (**Figure 2d**); the  
176 tents also provided privacy from the busy surrounding area as well as protection from the  
177 elements. The site played music in order to attract persons passing by and to create a  
178 welcoming and positive environment for those attending the site. Large, colorful signs in both  
179 Spanish and English were hung around and near the site to generate further awareness and  
180 encourage community members to register to get vaccinated.

181 The vaccine site officially opened on February 1, 2021 and remains operational. It  
182 provided clients either the Pfizer or Moderna COVID-19 mRNA two-dose vaccine, depending  
183 on availability. In order to minimize inconvenience for busy, socioeconomically vulnerable  
184 community members, the vaccine strategy prioritized smooth logistics and avoiding any need  
185 to reschedule appointments. To this end, while following dosage segment regulations we  
186 worked closely with the SFDPH and California health officials to mitigate any disruptions in  
187 vaccine availability. We further limited vaccination appointments to reduce the likelihood of  
188 vaccine stock-out and to facilitate site logistics. As we developed clinic operating protocols and  
189 improved efficiency, we were able to raise the appointment cap to 500 per day.

190

### 191 **Vaccination site personnel and customer service principles (client-centeredness)**

192 The UeS neighborhood vaccination site was predominantly staffed by trained members of the  
193 local community who were bicultural and bilingual or monolingual Spanish speakers.



194 Vaccinations were provided by bicultural and bilingual Spanish-speaking BayPLS and UeS  
195 staff, many whom had worked for prior UeS mass community-based COVID-19 testing events.  
196 The number of staff on site changed throughout the implementation period based on demand  
197 and ranged between 25 and 30 and peaked at 40 during mid-April 2021 when the general  
198 population became eligible for the COVID-19 vaccine in California. Staffing at the site  
199 consisted of 6 persons registering clients for vaccination appointments, 3 persons greeting and  
200 checking-in clients, 12 people preparing and administering vaccines, 2 people assisting clients  
201 with translation and navigation, 2 people roaming the site ('community health team') providing  
202 education, answering any client questions, and discussing how to motivate unvaccinated  
203 friends and family, 2 persons supporting check-out procedures including vaccine card  
204 preparations, and 2 site managers overseeing staff and logistics. The security and safety of  
205 clients and staff were extremely important considerations and were provided by Promotores  
206 and members of San Francisco's Community Ambassadors program.

207 All site personnel were selected based on their desire to serve their community with  
208 respect and compassion; they received initial and ongoing training emphasizing the  
209 importance of kindness and helpfulness and that the "client" needs should be understood and  
210 respected. All site personnel were also provided basic education on key facts related to  
211 COVID-19 vaccinations, based on the principle that any community member might ask any  
212 staff member basic COVID-19 vaccine questions at any time point in the process, and such  
213 question provide important teaching opportunities. Daily morning staff meetings occurred  
214 throughout the implementation period, which provided opportunities to discuss ongoing  
215 successes and challenges as well as changing COVID-19 vaccine eligibility criteria and any  
216 associated necessary adaptations in strategies; they also served as an important opportunity  
217 to provide staff refresher trainings on client-centeredness and updated education as new  
218 knowledge related to COVID-19 vaccines became available.

219

### 220 **Low-barrier registration and vaccination approach**

221 COVID-19 vaccine registration was originally available on-site, but it was quickly moved to the  
222 nearby UeS testing site given high demand, long lines and resultant congestion. We initially  
223 only provided in-person registration to preferentially provide access to eligible community  
224 members for whom online registration, as required at the time for most other vaccination sites,

225 presented a barrier to access. In-person appointment scheduling was available onsite outside  
226 of operational hours and served as an opportunity for community members to interact and  
227 converse with one another while awaiting scheduling. To remove barriers to registration and  
228 vaccine appointment check-in, especially for clients who may have had immigration fears or  
229 concerns, community members were able to self-attest to their eligibility. Clients were not  
230 required to show any form of identification, or to provide proof of residence, or healthcare  
231 insurance in order to be scheduled. Upon arriving at the vaccination site, clients were checked  
232 in and scheduled for their second vaccine dose. Following vaccination, clients waited for at  
233 least 15 minutes in the post-vaccination waiting area (**Figure 2d**), where site staff provided  
234 them education on adverse side effects to monitor for and ensured that any questions were  
235 answered (**Table 1**). Those clients who did not have insurance or a primary care provider were  
236 set up with a community health partner who offered low barrier care in the event that they had  
237 any health concerns beyond the standard expected side effects of vaccination. Upon request,  
238 clients were provided letters for employers to account for their time away from work. Clients were  
239 provided their proof of vaccination only at the end of this observation period.

240

### 241 **Leveraging social networks to increase vaccine uptake (“Activate”)**

242 In recognition of the important role that vaccinated individuals play in influencing COVID-19  
243 vaccine knowledge, attitudes and beliefs (and ultimately vaccine uptake) among their friends,  
244 family members, and co-workers, we sought to empower clients to become “vaccine  
245 ambassadors (**Table 1**).” During the post-vaccination waiting period, two dedicated staff  
246 members (who also provided post-vaccination education and answered any questions), shared  
247 their personal experiences, encouraged clients to reach out to members of their social network  
248 that had not yet been vaccinated and share their positive vaccination experiences and  
249 recommend that they too get vaccinated. This simple act serves multiple functions, including  
250 that the peer vaccine ambassador can provide COVID-19 vaccine education and debunk  
251 common myths and misconceptions, demonstrate good health-seeking behavior, serve as a  
252 credible source for vaccination experiences and also to provide social support to get  
253 vaccinated [21–23]. Site staff provided tips on how to handle difficult conversations and role-  
254 played different hypothetical scenarios with clients to bolster confidence. All vaccinated clients  
255 were provided fliers with UeS neighborhood vaccination site registration information that could

256 be handed out to unvaccinated friends, family members and coworkers. The flyer included a  
257 phone number for peer referrals of the vaccinated clients to call with any questions related to  
258 COVID-19 vaccines or registration.

## 259 **Evaluation of the “Motivate, Vaccinate, and Activate” Strategy**

### 260 **RE-AIM evaluation measures**

261 We evaluated the “Motivate, Vaccinate, and Activate” strategy using the Reach, Effectiveness,  
262 Adoption, Implementation and Maintenance (RE-AIM) framework. We chose the RE-AIM  
263 framework as it allowed us to evaluate both individual client-level outcomes (reach and  
264 effectiveness), as well as site and community-level outcomes (effectiveness, implementation,  
265 and maintenance) [24]. Furthermore, RE-AIM has recently been updated to include an explicit  
266 focus on equity and to address dynamic implementation contexts that may require adaptive  
267 strategies to maintain interventions over time [12]. This provided an enhanced framework to  
268 evaluate our implementation strategy, which sought to facilitate equitable vaccine access and  
269 uptake among Latinx community members and also have components that could be adapted  
270 to respond to rapidly changing community needs and public health guidance.

271 • **Reach:** We sought to reach and increase vaccine uptake among any Latinx adults and  
272 adolescents living in San Francisco, with an emphasis on the Mission District, as soon as  
273 they became eligible according SFDPH guidance. We conceptualized reach at two levels  
274 (proximal and distal). The proximal reach of our vaccination program included the number  
275 of individuals directly reached by each implementation strategy component. The distal  
276 reach included the number of individuals who were received a COVID-19 vaccination at the  
277 UeS neighborhood vaccination site. Because of the community-based design of our  
278 implementation strategy, it is difficult to measure proximal reach, e.g., the exact number of  
279 Latinx community members who were reached through the community mobilization and  
280 demand generation activities, as a result of simply passing by the community-located  
281 vaccination site, or through contact with peer vaccine ambassadors. However, because the  
282 UeS neighborhood vaccination site was outside of the formal healthcare system, these  
283 activities were necessary precursors for community members to become aware of,  
284 schedule, and receive a vaccination at the UeS neighborhood vaccination site. Therefore,  
285 our evaluation focused on distal reach, e.g., the number of individuals scheduled for  
286 vaccination and vaccinated at the UeS neighborhood site. In order to evaluate whether our

287 strategy reached Latinx people (the priority population our strategy was tailored for and  
288 aimed to reach) we also evaluated the demographic and socioeconomic characteristics of  
289 individuals vaccinated at the neighborhood vaccination site as measures of  
290 representativeness. We also assessed measures of geographic coverage by estimating the  
291 proportion of all Mission District (zip code 94110) residents vaccinated overall and among  
292 Latinx individuals as well as the proportion of all vaccinated individuals in San Francisco  
293 reached by the UeS neighborhood site overall and among Latinx persons.

- 294 • **Effectiveness:** There is strong evidence, including robust population-level data, that  
295 demonstrates that the COVID-19 vaccine, once administered, is highly effective in reducing  
296 the risk of COVID-19 disease and transmission [25–28]. Therefore, measures of  
297 effectiveness associated with the multicomponent implementation strategy used indicators  
298 of behavior change, including the proportion of clients who said that they were able to get  
299 vaccinated more quickly had the neighborhood site not existed and the proportion of clients  
300 who stated that they were more likely to reach out to and recommend vaccination to their  
301 unvaccinated friends, family members and coworkers after their experiences at the UeS  
302 neighborhood vaccination site. We also evaluated the proportion of clients at the  
303 neighborhood vaccination site who completed their second vaccine dose [29], as this metric  
304 may reflect a number of aspects of fidelity to and acceptability of the “Motivate, Vaccinate,  
305 and Activate” strategy and is therefore a composite quality outcome measure.
- 306 • **Implementation:** Implementation outcomes assessed were fidelity to each of the  
307 implementation strategy components (Motivate, Vaccinate, and Activate) as designed and  
308 also the acceptability of the overall implementation strategy among community members  
309 vaccinated through the UeS Neighborhood site.
- 310 • **Maintenance:** We evaluated maintenance in two ways. We first assessed temporal trends  
311 in the number of individuals receiving their first COVID-19 vaccination – overall and  
312 according to both eligibility criteria and ethnicity. This provided insight into the extent to  
313 which the “Motivate, Vaccinate, and Activate” strategy was able to evolve over time and  
314 mobilize different types individuals as they became eligible, while also being able to  
315 consistently reach Latinx individuals throughout the implementation period. We also  
316 documented and characterized adaptations during the implementation period.

## 317 **Data sources and Statistics**

318 Several data sources informed the evaluation of the “Motivate, Vaccinate, and Activate”  
319 strategy. Programmatic UeS vaccination data informed reach (including basic demographic  
320 characteristics), effectiveness and maintenance related-outcomes. SFDPH surveillance data was  
321 used to inform estimates of vaccination coverage [30]. Census data informed population  
322 estimates in the Mission District (zip code 94110) [14]. To better understand the characteristics  
323 of those being reached, the possible reach and effectiveness of the peer vaccine ambassador  
324 strategy component, and the acceptability of our strategy among clients served by the  
325 neighborhood vaccination site, we administered a structured survey between May 2, 2021 and  
326 May 19, 2021. The survey data also captured additional client information including household  
327 income, occupation, insurance status and primary care status. It was administered on-site  
328 among those in the waiting area following completion of their vaccination (either first or second  
329 dose). Fidelity to and adaptations made to the implementation strategy components were  
330 assessed, discussed and documented throughout the implementation period as part of daily  
331 meetings with UeS neighborhood vaccination site workers and weekly meetings with UeS  
332 leadership.

333 Data were administratively censored at May 19, 2021, corresponding to a 16-week  
334 evaluation period. Analyses were restricted to adolescents and adults 16 years of age and  
335 older. Simple descriptive statistics were used to characterize individuals - Fisher’s exact or chi-  
336 squared tests were applied, as appropriate. As we primarily aimed to reach Latinx community  
337 members through our “Motivate, Vaccinate, and Activate” Strategy, all outcomes were  
338 assessed overall and according to whether individuals identified as Latinx (e.g., Latinx versus  
339 not-Latinx).

## 340 **Results**

### 341 **Reach**

#### 342 **COVID-19 vaccine uptake**

343 Overall, there were 12,103 unique individuals registered for a COVID-19 vaccine at the UeS  
344 neighborhood vaccination site between February 1 and May 19, 2021, of which 11,098  
345 (91.7%) received at least one vaccine dose at the neighborhood site; the proportion of persons  
346



347 registered who received at least one vaccine dose at the neighborhood site did not differ  
348 according to age, sex or ethnicity (**Supplementary Table 1**). In total, 20,792 COVID-19  
349 vaccine doses were administered to community members  $\geq 16$  years old during the evaluation  
350 period.

351 The characteristics of 11,098 individuals receiving at least one COVID-19 vaccination at  
352 the UeS neighborhood vaccination site are shown in **Table 2**. Vaccine recipients had a median  
353 age of 43 (IQR, 32-56) years, 53.9% were male, and 70.5% were Latinx, 7.7% were Asian,  
354 2.4% were black and 14.1% were white; 50.7% and 14.3% were either a first- or second-  
355 generation immigrant, respectively. The majority of clients receiving a vaccine dose worked in  
356 front-facing retail jobs and 61.0% of individuals had an annual household income of less than  
357 \$50,000 per year (**Table 2**). More than one-third (36.9%) of clients did not have health  
358 insurance and nearly half (46.3%) did not have an established primary care provider. Latinx  
359 clients were substantially more likely than non-Latinx clients to have an annual household  
360 income of less than \$50,000 a year (76.1% vs. 33.5%), be a first-generation immigrant (60.2%  
361 vs. 30.1%), not have health insurance (47.3% vs. 16.0%), and not have access to primary  
362 healthcare services (62.4% vs. 36.2%) (**Table 2**).

363 Next, we assessed COVID-19 vaccine coverage associated with the UeS Neighborhood  
364 vaccination site. Among all eligible individuals ( $\geq 16$  years old) estimated to be living in the  
365 Mission District (zip code 94110), 5.7% ( $n=3,590/62,452$ ) received at least one vaccine dose at  
366 the neighborhood site; this included 11.9% ( $n=2,484/20,859$ ) of the estimated number of Latinx  
367 residents. Compared to the ethnic makeup of the Mission District, clients receiving at least one  
368 vaccine dose at the neighborhood vaccination site were far more likely to be Latinx (70.5% vs.  
369 33.4%) and far less likely to be white (14.1% vs. 44.8%) (**Figure 3**). While the neighborhood  
370 site was based in the Mission District (zip code 94110), it had broad geographic reach, such  
371 that less than one-third (32.3%) of all vaccine recipients resided in the Mission District (**Figure**  
372 **4**); the vaccination site was accessed by a large number of predominantly Latinx individuals  
373 residing and working throughout San Francisco and the Bay Area (**Supplementary Table 2**).  
374 The neighborhood site also appeared to reach persons residing predominantly in the  
375 neighborhoods of San Francisco that have been the most impacted by COVID-19 (**Figure 4,**  
376 **Supplementary Figure 1, Supplementary Table 2**).

377



## 378 **Factors influencing clients to get vaccinated at neighborhood site**

379 Of 3,597 clients offered to take a survey about their vaccination experiences, 997 (27.7%)  
380 completed the survey; compared to those who declined survey participation, survey  
381 respondents were slightly younger and less likely to be Latinx (**Supplementary Table 3**).  
382 Clients who were vaccinated at the UeS neighborhood vaccination site reported that they had  
383 heard about or became aware of the site in a number of different ways (**Table 3**). Clients most  
384 commonly found out about the site was from a friend, family member or co-worker (36.1%); a  
385 large number of clients also reported receiving a text invitation on their phone (21.0%), walking  
386 past the community-based site (17.8%) and receiving a direct referral from the nearby UeS  
387 COVID-19 testing site (11.4%). Clients less commonly cited having been made aware of the  
388 site through outreach from a community volunteer, or via a flyer, social media, or news sources  
389 (**Table 3**). Notably, the proportion of clients stating that they heard about the site through a  
390 friend or family member did not differ substantially by ethnicity (37.8% vs. 32.6%; **Table 3**).  
391 However, compared to non-Latinx clients, Latinx clients were more likely to report hearing  
392 about the site by directly passing by it in the neighborhood, and were less likely to have  
393 received a direct text invitation (**Table 3**).

394 Clients reported that their single most important reason for choosing to get vaccinated  
395 at the UeS neighborhood site was (1) because it was in their neighborhood (29.0%), (2)  
396 because scheduling was easy and convenient (26.7%) and (3) because someone they trusted  
397 had recommended it to them (18.0%) (**Table 3**). Latinx clients were more likely to choose the  
398 site because of its bilingual staff compared non-Latinx clients but were less likely to cite the  
399 ease and efficiency of scheduling as an enabling factor (**Table 3**).

400

## 401 **Implementation**

402

### 403 **Fidelity**

404 Overall, we were able to deliver each of the components of the “Motivate, Vaccinate, and  
405 Activate” strategy as originally intended. As intended by design, the strategy was adapted in  
406 response to rapid evolving eligibility criteria and site capacity (**Table 4**). Most adaptations to  
407 the strategy occurred early on and were related to the “Vaccinate” component of the strategy.

408 We aimed to provide timely vaccination to all community members who were eligible and  
409 wished to be vaccinated at the neighborhood site. While that was often possible, at times,  
410 peaks in demand exceeded our capacity to provide immediate vaccinations. In order to not  
411 delay vaccination among highly motivated community members, we partnered and worked  
412 closely with a local safety net hospital to extend the reach of our strategy by facilitating  
413 referrals for typically either same-day or next-day vaccination appointments. There were two  
414 key features of this adaption: (1) free transportation was provided to any referred client who  
415 needed it and (2) a UeS community team member went with referred clients or met them at the  
416 hospital to provide support and help navigate any additional barriers to getting vaccinated.  
417 While complete estimates are not available, more than 2,400 additional community members  
418 were directly referred and scheduled for vaccination through this strategy, including  
419 approximately 850 during the second week of March 2021. We believe that this was a key  
420 adaptation that was needed as to not undermine the overall effectiveness of our strategy,  
421 however, it was only required for less than four weeks.

422

## 423 **Acceptability**

424 The UeS neighborhood site was highly acceptable to clients who were vaccinated there. Of  
425 997 clients completing the survey, 98.6% stated that they would recommend the site to others;  
426 this did not differ between Latinx and non-Latinx clients (**Supplementary Table 4**). Clients  
427 were more likely to say that they would recommend the site to family members (82.1%) and  
428 friends (84.5%) than to co-workers (67.1%) (**Supplementary Table 4**).

429 The features of the neighborhood vaccination site and their vaccination experience that  
430 clients stated that they liked the most were (1) the friendly and professional staff (40.3%), and  
431 (2) that the process was fast and efficient (32.8%) (**Supplementary Table 4**). Latinx clients  
432 were more likely to say that staff friendliness and professionalism was the site feature they  
433 liked the most about the neighborhood site, while non-Latinx clients were more likely to state  
434 they most liked the overall efficiency of the process (on average wait time was less than 5  
435 minutes from check in) (**Figure 5a**). Clients stated that they liked and appreciated many  
436 additional features of the neighborhood vaccination site and preferences differed by ethnicity  
437 (**Figure 5b, Supplementary Table 4**). Latinx clients were more likely to state they liked that  
438 the staff was bilingual. Notably, more than a quarter of Latinx (26.3%) and non-Latinx clients

439 (30.5%) reported that they liked that they did not need to show documentation of residency or  
440 proof of vaccine eligibility. Very few clients reported any aspects of their experience that they  
441 disliked. A few clients noted that they had experienced long wait times but were not bothered  
442 by it, while one client felt that the outdoor setting was not private enough. Several people  
443 responded that the site experience could be further improved by providing onsite toilets.

444

## 445 **Maintenance**

446 Several adaptations were made during the early implementation period, but there were very  
447 few subsequent adaptations and the “Motivate, Vaccinate, and Activate” strategy was  
448 delivered with high fidelity over time (**Table 4**). An important feature that allowed us to continue  
449 to deliver our strategy with fidelity was that there was consistent staffing that helped facilitate  
450 group communication and cohesiveness.

451 As the eligibility for COVID-19 vaccination shifted over time in San Francisco, the  
452 “Motivate, Vaccinate, and Activate” strategy was able to continue to reach and facilitate  
453 vaccination of newly eligible community members (**Figure 6a**). Notably, despite evolution of  
454 the eligibility criteria over time, the large majority of clients reached throughout the entire  
455 implementation period were Latinx (**Figure 6b**). While the number of new individuals  
456 vaccinated in May 2021 declined (mirroring local and national trends) (**Figure 6a**), the  
457 proportion of daily vaccinations that were among Latinx individuals increased (**Figure 6b**).

458

## 459 **Effectiveness**

### 460 **Indicators of positive behavior change**

461 There were 58.4% of clients that said they got vaccinated sooner than they otherwise would  
462 have had the neighborhood vaccination site not existed; this included 56.1% of Latinx clients  
463 and 63.2% of non-Latinx clients (**Table 5**). After their experiences at the neighborhood  
464 vaccination site, 90.1% of clients said they were more likely to recommend getting vaccinated  
465 to family members, friends, and co-workers; this did not meaningfully differ by ethnicity (**Table**  
466 **5**).

467 Approximately 40% (40.3%) of clients said that they knew at least one person that had yet to  
468 be vaccinated; this was slightly higher among Latinx clients than non-Latinx clients (42.9% vs.  
469 34.7%). Of clients who reported knowing unvaccinated individuals, 64.6% reported knowing 3  
470 or more. Among clients who received both vaccine doses (n=729), 91.0% said that after their  
471 first vaccination experience, they personally reached out to at least one unvaccinated person  
472 they knew to recommend COVID-19 vaccination; Latinx clients were more likely than non-  
473 Latinx clients to reach out and recommend vaccination to 3 or more persons (65.3% vs.  
474 55.9%; **Table 5**). Notably, 83.0% of clients stated that they were aware of at least 1 family

475 member, friend or co-worker who got vaccinated as a result of their direct outreach; Latinx  
476 clients were more likely than non-Latinx persons to report that 3 or more persons got  
477 vaccinated a result of their influence (46.7% vs. 36.5%; **Table 5**).

478 Next, we evaluated the proportion of clients receiving their first COVID-19 vaccine dose  
479 at the UeS neighborhood site, who also completed their second vaccine dose. Among 9,305  
480 clients with at least 4 weeks of follow-up time since their first vaccine dose, 9,152 (98.4%)  
481 completed their second dose; the proportion of clients completing both vaccine doses did not  
482 differ according to age, sex or ethnicity (**Supplementary Table 5**).

483

## 484 Discussion

485 From the onset of the COVID-19 pandemic, there have been stark racial and ethnic disparities  
486 of populations infected and vaccinated, reflecting known health inequities in the United States  
487 [7,8]. In the setting of a rapidly moving pandemic such as COVID-19, the challenge is how to  
488 overcome in a short time period the decades of disparate access to care and resulting mistrust  
489 among vulnerable populations in a way that improves health outcomes and can lead to  
490 sustained gains in health delivery. Via a community, academic and public health partnership  
491 (Unidos en Salud) we developed and evaluated a community-based, “Motivate, Vaccinate, and  
492 Activate” strategy. We sought to increase uptake of COVID-19 vaccination among Latinx  
493 persons and to activate clients to be community vaccine ambassadors within their social  
494 networks.

495 We effectively reached the target population—70% of more than 11,000 vaccine  
496 recipients during the evaluation period were Latinx, the majority of whom were first generation  
497 immigrants with a household income of less than \$50,000 and without a primary care provider.  
498 The geographic reach extended to the Latinx community beyond the surrounding  
499 neighborhood to the Southeast sector of San Francisco, the area with the most COVID-19  
500 cases in San Francisco [30]. The vaccination program was highly acceptable, with 99% of  
501 clients reporting they would recommend the site to others. The program was also highly  
502 effective, as 58% of people reported that they were vaccinated sooner because of the  
503 program, and among those who received both vaccine doses, over 90% of clients personally  
504 reached out to at least one person in their social network to recommend COVID-19  
505 vaccination. Additionally, 98% of clients completed both vaccine doses, which is higher than  
506 early national estimates of 88% [29]. To our knowledge, this is the first evaluation of the  
507 implementation and effectiveness of a multicomponent community-based vaccination program  
508 designed to reach the Latinx community.

509 Our data suggest that efforts to address access and trust-related barriers underlie the  
510 effectiveness of the program. Access-related barriers drive a large portion of the COVID-19  
511 vaccination disparities between Latinx and non-Latinx White people [10]. Our site was  
512 embedded in the San Francisco Mayor’s strategy to offer vaccination through multiple venues,  
513 including mass vaccination sites, health care and nursing home settings, pharmacies, and  
514 community sites. Local community sites can remove transportation barriers inherent to mass



515 sites, mitigate issues of trust, and reach persons who are not actively connected with a formal  
516 health system. Despite all San Franciscan's being eligible for health care, many vulnerable  
517 community members do not identify as having a primary physician or health insurance.  
518 Reasons may include the many administrative steps required for health care registration,  
519 language barriers, lack of outreach and navigation services on the part of health institutions  
520 and mistrust of government institutions based on past negative experiences. Clients at our  
521 vaccine site reported geographic convenience outside of a hospital setting and ease of  
522 registration (computer access not required) among their top reasons for choosing the  
523 neighborhood vaccine site. Time away from work for front-line workers is a major consideration  
524 for engagement in health care. The speed and efficiency of the experience was among the top  
525 three factors that people appreciated about the site.

526 Our survey results are consistent with recent national surveys that highlighted the  
527 importance of access-related barriers among Latinx persons who had not yet received the  
528 vaccine, with concerns about missing work, transport to the site, and information gaps about  
529 cost and impact on legal status [10]. Placing vaccine sites in central locations such as such as  
530 in Grand Central Station in New York, or trusted community sites such as churches has also  
531 yielded promising results [31–34]. While convenience was an important feature of the vaccine  
532 site, it alone is likely insufficient, and ensuring trust in the vaccine itself is the first step to  
533 getting people to come to the site.

534 In the “Motivate” component of our model, we used multiple approaches to address  
535 concerns voiced by Latinx persons, drawn both from prior work of Unidos en Salud in San  
536 Francisco and from national surveys, including safety, cost, eligibility, and effects on  
537 immigration status [9,10]. Strategies to address these concerns included high-touch methods  
538 such as ‘door-to-door’ vaccine education and registration and mobilization by trusted  
539 community leaders via their social networks. We also employed less resource-intensive  
540 vaccine promotion strategies such as Spanish-language media, in which Unidos En Salud  
541 community leaders provided information and answered questions on COVID-19 vaccines. Our  
542 community team posted flyers in the neighborhood, including at local businesses, and handed  
543 out educational information about vaccines at our adjacent COVID-19 testing site (Table 1).

544 Our data highlight the importance of trusted messengers in the decision to come to the  
545 community vaccine site [23]. Nearly 20% of clients said that the most important factor in their

546 decision to come to the vaccine site was because someone they trusted recommended it to  
547 them, as opposed to less than 5% who heard about the site through a flyer in the community or  
548 media campaigns. These data are consistent with prior data on the positive impact of door to-  
549 door outreach [35] and endorsements from trusted community members on increasing  
550 vaccination from influenza [36], childhood vaccines [37], and HPV vaccines [38]. Our findings  
551 are also consistent with a multicomponent intervention involving mobile clinics and religious  
552 leaders as vaccine ambassadors that led to high uptake among COVID-19 vaccines among  
553 Black people living in a community in Southern California [34]. Multi-pronged approaches to  
554 community-led education and outreach can increase trust in vaccine safety, effectiveness, and  
555 the healthcare system, and are fundamental to facilitating forward movement along the entire  
556 continuum of vaccine hesitancy [36–41].

557 Paramount to our strategy was to create a convenient, language-concordant, and  
558 welcoming vaccination site. The client experience at the site, including efficiency, and access  
559 to bilingual staff and health education in the post-vaccination area likely amplified trust in both  
560 the vaccination site and the vaccine itself. This was evidenced by the finding that 99% of  
561 vaccinated clients reported that they would recommend the site to their friends or family  
562 members, and that nearly two-thirds recommended COVID-19 vaccination to 3 or more people  
563 in their social network. Additionally, friendly and professional staff were the features Latinx  
564 clients liked most about the neighborhood vaccination site.

565 Peer-referrals and social network interventions can increase trust in marginalized  
566 communities and rapidly diffuse innovations. It was notable that even when San Francisco  
567 exceeded more than 75% coverage of COVID-19 vaccination among residents  $\geq 16$  years old,  
568 the social networks of people at our vaccine site still included large numbers of unvaccinated  
569 friends and family members. That our clients most frequently heard about the UeS  
570 neighborhood vaccination site from a friend or family member (36%) and more than 80% of  
571 vaccinated clients then positively influenced an unvaccinated person they knew to get  
572 vaccinated strongly supports the value of social network interventions in our setting and their  
573 potential to build trust and reach unvaccinated people. Our community health team, a bilingual  
574 bicultural team of community members, provided additional education about COVID-19  
575 vaccines, testing, answered related questions and shared their own experiences about  
576 encouraging friends and loved ones to get vaccinated. We hypothesize that these positive

577 interactions addressed information gaps and empowered people to become ‘vaccine  
578 ambassadors,’ and reach out to their unvaccinated family members, friends and co-workers.  
579 These findings build upon a growing body of literature demonstrating the effectiveness of  
580 social network interventions for positive health promotion, including prevention strategies for  
581 HIV (PrEP), STI and HIV testing, as well as other health behaviors and outcomes including  
582 smoking cessation, alcohol misuse, and improving hemoglobin A1c levels in persons with  
583 diabetes [42].

584 Although most factors influencing vaccination at our site were similar across race and  
585 ethnicity, Latinx compared to non-Latinx were more likely to report that bilingual staff were an  
586 important factor for choosing the site. This highlights the importance of language and cultural  
587 concordance throughout all stages from community outreach and mobilization, through  
588 vaccination to address structural barriers, information-gaps about vaccine eligibility, and  
589 perceptions that the COVID-19 vaccine costs money and can impact one’s immigration status.  
590 Additionally, requirements to provide documentation increases access-related barriers,  
591 especially for first generation immigrants and people who work informal jobs. Over 40% of  
592 Latinx persons in a national survey cited concern about having to provide documentation and  
593 40% feared that the process would impact their legal status [10]. To address these concerns  
594 and to lower the barrier to vaccinations, we did not require identification or proof of vaccine  
595 eligibility at our vaccine site, and approximately one third of clients reported that they  
596 appreciated this feature. Removing the requirement for identification or proof of residence or  
597 employment should be considered in the design of low-barrier vaccine sites.

598 Our implementation strategy quickly adapted to changes in vaccine eligibility which  
599 created surges in demand over time. (Table 4). Initially vaccine demand exceeded supply. To  
600 address this need and not turn people away, we expanded our vaccine site to also include a  
601 vaccine navigation hub and become a gateway to a higher volume vaccine site at the safety-  
602 net hospital nearby. To facilitate access to larger vaccine sites, we arranged free  
603 transportation, helped schedule appointments on-site, and had our community workers  
604 accompany clients to the hospital site in order to overcome mistrust and fear of formal health  
605 care systems. Later, as supply exceeded demand, we shifted our mobilization strategy away  
606 from posting flyers in the community and harnessing Spanish language media, to more  
607 individualized ‘one-on-one’ discussions and also a focus on a social network-based approach

608 as persons at our vaccine still had a large number of people in their network who remained  
609 unvaccinated. Financial and non-financial incentives can be effective in promoting vaccinations  
610 and adaptations that include incentives are worth further consideration and study [37,43,44].

611 The evaluation of our program has some limitations. Our methods underestimate the  
612 program's reach, as we could not quantify the number of people who were influenced by our  
613 multifaceted, community-based demand generation activities, but who were vaccinated at a  
614 different site. Additionally, our reported reach does not include over 2,000 direct referrals to the  
615 vaccination site at the nearby county hospital. Secondly, the structured survey on clients'  
616 experiences was only completed during the period of general eligibility, and experiences may  
617 have differed compared to the beginning of the program. This can also be seen as a strength,  
618 as the findings are more generalizable to the current vaccine landscape—where supply is  
619 greater than demand and all adults are eligible for the vaccine. As with most multi-component  
620 interventions, we are unable to fully disentangle the relative effects of the different components  
621 and subcomponents of the overall strategy. There are also some limitations to our  
622 measurements of effectiveness; though a high proportion of people reported that someone  
623 they referred received a vaccine, we could not measure this directly. However, even if the peer  
624 referral did not result in a vaccination, it is likely that the referral served as a nudge further  
625 down the continuum towards vaccine confidence.

626 In conclusion, our “Motivate, Vaccinate, and Activate” vaccine promotion strategy  
627 reached a high proportion of Latinx residents in San Francisco. We attribute the success of the  
628 program to demand generation through trusted messengers and social networks, multi-faceted  
629 and adaptable mobilization strategies, and a convenient and welcoming neighborhood vaccine  
630 site. Our Unidos en Salud community, academic, and public health partnership and co-design  
631 was fundamental to the program and cannot be underestimated. Though this program was  
632 geared towards addressing the specific barriers and needs of the Latinx community in San  
633 Francisco, the fundamental pillars of this program can be adapted to other local contexts.

634  
635  
636

637 **Acknowledgements**

638 We would like to thank the community members who participated in this initiative and the many  
639 vaccination site staff, community ambassadors, and volunteers. We thank the Chan  
640 Zuckerberg Initiative, Supervisor Hillary Ronen, Mayor London Breed, The San Francisco  
641 Department of Public Health and Dr. Grant Colfax, Dr. Naveena Bobba, Dr. Susan Phillips, Dr.  
642 Mary Mercer, Emily Reingold, and Dr. Ellen Chen. We gratefully acknowledge the San  
643 Francisco Latino Task Force, Bay Area Phlebotomy and Laboratory Services (BayPLS), Stacy  
644 Powers and BRAVA for Women in the Arts, Bevan Dufty and the BART team, PrimaryBio  
645 COVID-19 Testing Platform, Dr. Rachel Stern, Phillipa Doyle, and Ricardo Duarte from  
646 Zuckerberg San Francisco General Hospital, Dr. Jessica Briggs and Dr. Susa Coffey from  
647 UCSF, and Dara Fonseca, Jocelin Payan, and Jack Fukushima from Unidos en Salud. We  
648 also would like to thank Mike Kai Chen for the use of his photographs in this manuscript.

649

650 **Financial disclosure statement**

651 This work was supported by University of California, San Francisco, the Chan Zuckerberg  
652 Initiative, and the San Francisco Department of Public Health. A.D.K and L.R. was funded by  
653 T32 AI060530. The funders had no role in study design, data collection and analysis, decision  
654 to publish, or preparation of the manuscript.

655

656 **Competing interests**

657 None of the authors have any competing interests to declare.

658 **References**

659

- 660 1. Chamie G, Marquez C, Crawford E, Peng J, Petersen M, Schwab D, et al. SARS-CoV-2  
661 Community Transmission disproportionately affects Latinx population during Shelter-in-Place  
662 in San Francisco. *Clin Infect Dis*. 2020; ciaa1234-. doi:10.1093/cid/ciaa1234
- 663 2. Gil RM, Marcelin JR, Zuniga-Blanco B, Marquez C, Mathew T, Piggott DA. COVID-19  
664 Pandemic: Disparate Health Impact on the Hispanic/Latinx Population in the United States. *J*  
665 *Infect Dis*. 2020; jiaa474-. doi:10.1093/infdis/jiaa474
- 666 3. Kullar R, Marcelin JR, Swartz TH, Piggott DA, Gil RM, Mathew TA, et al. Racial Disparity of  
667 Coronavirus Disease 2019 (COVID-19) in African American Communities. *J Infect Dis*.  
668 2020;222: jiaa372-. doi:10.1093/infdis/jiaa372
- 669 4. Rodriguez-Diaz CE, Guilamo-Ramos V, Mena L, Hall E, Honermann B, Crowley JS, et al.  
670 Risk for COVID-19 infection and death among Latinos in the United States: examining  
671 heterogeneity in transmission dynamics. *Ann Epidemiol*. 2020;52: 46-53.e2.  
672 doi:10.1016/j.annepidem.2020.07.007
- 673 5. Bibbins-Domingo K, Petersen M, Havlir D. Taking Vaccine to Where the Virus Is—Equity  
674 and Effectiveness in Coronavirus Vaccinations. *Jama Heal Forum*. 2021;2: e210213.  
675 doi:10.1001/jamahealthforum.2021.0213
- 676 6. Hooper MW, Nápoles AM, Pérez-Stable EJ. No Populations Left Behind: Vaccine Hesitancy  
677 and Equitable Diffusion of Effective COVID-19 Vaccines. *J Gen Intern Med*. 2021; 1–4.  
678 doi:10.1007/s11606-021-06698-5
- 679 7. Ndugga N, Pham O, Hill L, Artiga S, Alam R, Parker N. Latest Data on COVID-19  
680 Vaccinations Race/Ethnicity. Available at: [https://www.kff.org/coronavirus-covid-19/issue-](https://www.kff.org/coronavirus-covid-19/issue-brief/latest-data-on-covid-19-vaccinations-race-ethnicity/)  
681 [brief/latest-data-on-covid-19-vaccinations-race-ethnicity/](https://www.kff.org/coronavirus-covid-19/issue-brief/latest-data-on-covid-19-vaccinations-race-ethnicity/). Accessed May 20, 2021.
- 682 8. California Department of Public Health. Vaccination progress data - Coronavirus COVID-19  
683 Response. Available at: <https://covid19.ca.gov/vaccination-progress-data/>. Accessed May 20,  
684 2021.
- 685 9. Peng J, Marquez C, Rubio L, Chamie G, Jones D, Jacobo J, et al. High likelihood of  
686 accepting COVID-19 vaccine in a Latinx community at high SARS-CoV2 risk in San Francisco.  
687 *Open Forum Infect Dis*. 2021; ofab202-. doi:10.1093/ofid/ofab202
- 688 10. Kaiser Family Foundation. KFF Covid-19 vaccine monitor: April 2021. Available at:  
689 <https://www.kff.org/coronavirus-covid-19/poll-finding/kff-covid-19-vaccine-monitor-april-2021/>.  
690 Accessed May 21, 2021.
- 691 11. Williams DR, Cooper LA. Reducing Racial Inequities in Health: Using What We Already  
692 Know to Take Action. *Int J Environ Res Pu*. 2019;16: 606. doi:10.3390/ijerph16040606



- 693 12. Shelton RC, Chambers DA, Glasgow RE. An Extension of RE-AIM to Enhance  
694 Sustainability: Addressing Dynamic Context and Promoting Health Equity Over Time. *Frontiers*  
695 *Public Heal.* 2020;8: 134. doi:10.3389/fpubh.2020.00134
- 696 13. Urban Displacement Project. Rising Housing Costs and Re-Segregation in San Francisco.  
697 2018 Sep. Available: [https://www.urbandisplacement.org/sites/default/files/images/sf\\_final.pdf](https://www.urbandisplacement.org/sites/default/files/images/sf_final.pdf).  
698 Accessed May 21, 2021.
- 699 14. Census Reporter. ZIP Code Tabulation Area 94110, San Francisco, CA. Available at:  
700 <https://censusreporter.org/profiles/86000US94110-94110/>. Accessed May 21, 2021.
- 701 15. Pilarowski G, Lebel P, Sunshine S, Liu J, Crawford E, Marquez C, et al. Performance  
702 characteristics of a rapid SARS-CoV-2 antigen detection assay at a public plaza testing site in  
703 San Francisco. *J Infect Dis.* 2021;223: jiaa802-. doi:10.1093/infdis/jiaa802
- 704 16. Kerkhoff AD, Sachdev D, Mizany S, Rojas S, Gandhi M, Peng J, et al. Evaluation of a  
705 novel community-based COVID-19 ‘Test-to-Care’ model for low-income populations. *Plos One.*  
706 2020;15: e0239400. doi:10.1371/journal.pone.0239400
- 707 17. Rubio LA, Peng J, Rojas S, Rojas S, Crawford E, Black D, et al. The COVID-19 Symptom  
708 to Isolation Cascade in a Latinx Community: A Call to Action. *Open Forum Infect Dis.* 2021;8:  
709 ofab023. doi:10.1093/ofid/ofab023
- 710 18. Fields J, Gutierrez RJ, Marquez C, Rhoads K, Kushel M, Fernandez A, et al. Community-  
711 Academic Partnerships to Address COVID-19 Inequities: Lessons from the San Francisco Bay  
712 Area. *NEJM Catal.* 2021. In press.
- 713 19. The San Francisco Latino Task Force on COVID-19. Available at:  
714 <https://www.ltfrespuestalatina.com/>. Accessed May 21, 2021.
- 715 20. Porter CM. Revisiting Precede–Proceed: A leading model for ecological and ethical health  
716 promotion. *Health Educ J.* 2016;75: 753–764. doi:10.1177/0017896915619645
- 717 21. Funnell MM. Peer-based behavioural strategies to improve chronic disease self-  
718 management and clinical outcomes: evidence, logistics, evaluation considerations and needs  
719 for future research. *Fam Pract.* 2010;27: i17–i22. doi:10.1093/fampra/cmp027
- 720 22. Fisher EB, Ballesteros J, Bhushan N, Coufal MM, Kowitt SD, McDonough AM, et al. Key  
721 Features of Peer Support In Chronic Disease Prevention And Management. *Health Affair.*  
722 2017;34: 1523–1530. doi:10.1377/hlthaff.2015.0365
- 723 23. National Academies of Sciences and Engineering Medicine. Strategies for Building  
724 Confidence in the COVID-19 Vaccines. Available at:  
725 [https://www.nap.edu/catalog/26068/strategies-for-building-confidence-in-the-covid-19-](https://www.nap.edu/catalog/26068/strategies-for-building-confidence-in-the-covid-19-vaccines)  
726 [vaccines](https://www.nap.edu/catalog/26068/strategies-for-building-confidence-in-the-covid-19-vaccines). Accessed May 21, 2021.

- 727 24. Glasgow RE, Harden SM, Gaglio B, Rabin B, Smith ML, Porter GC, et al. RE-AIM Planning  
728 and Evaluation Framework: Adapting to New Science and Practice With a 20-Year Review.  
729 *Frontiers Public Heal.* 2019;7: 64. doi:10.3389/fpubh.2019.00064
- 730 25. Polack FP, Thomas SJ, Kitchin N, Absalon J, Gurtman A, Lockhart S, et al. Safety and  
731 Efficacy of the BNT162b2 mRNA Covid-19 Vaccine. *New Engl J Med.* 2020;383: 2603–2615.  
732 doi:10.1056/nejmoa2034577
- 733 26. Baden LR, Sahly HME, Essink B, Kotloff K, Frey S, Novak R, et al. Efficacy and Safety of  
734 the mRNA-1273 SARS-CoV-2 Vaccine. *New Engl J Med.* 2020;384: 403–416.  
735 doi:10.1056/nejmoa2035389
- 736 27. Haas EJ, Angulo FJ, McLaughlin JM, Anis E, Singer SR, Khan F, et al. Impact and  
737 effectiveness of mRNA BNT162b2 vaccine against SARS-CoV-2 infections and COVID-19  
738 cases, hospitalisations, and deaths following a nationwide vaccination campaign in Israel: an  
739 observational study using national surveillance data. *Lancet.* 2021;397: 1819–1829.  
740 doi:10.1016/s0140-6736(21)00947-8
- 741 28. Benenson S, Oster Y, Cohen MJ, Nir-Paz R. BNT162b2 mRNA Covid-19 Vaccine  
742 Effectiveness among Health Care Workers. *New Engl J Med.* 2021;384: 1775–1777.  
743 doi:10.1056/nejmc2101951
- 744 29. Kriss JL, Reynolds LE, Wang A, Stokley S, Cole MM, Harris LQ, et al. COVID-19 Vaccine  
745 Second-Dose Completion and Interval Between First and Second Doses Among Vaccinated  
746 Persons — United States, December 14, 2020–February 14, 2021. *Morbidity Mortal Wkly Rep.*  
747 2021;70: 389–395. doi:10.15585/mmwr.mm7011e2
- 748 30. San Francisco Department of Public Health: COVID-19 Data and Reports. Available at:  
749 <https://data.sfgov.org/stories/s/fjki-2fab>. Accessed May 23, 2021.
- 750 31. Cabanatuan M. Line around the block for COVID vaccinations in East Oakland. *San*  
751 *Francisco Chronicle.* 4 Apr 2021. Available: <https://www.sfchronicle.com/local/article/Line-around-the-block-for-COVID-shots-in-East-16075137.php>
- 753 32. Zaveri M. New York will offer vaccines at some subway stops through a pilot program. *New*  
754 *York Times.* 10 May 2021. Available: <https://www.nytimes.com/2021/05/10/nyregion/nyc-vaccine-subway.html>
- 756 33. Weiland N. In New Vaccination Push, Biden Leans on His ‘Community Corps.’ *New York*  
757 *Times.* 16 May 2021. Available: <https://www.nytimes.com/2021/05/16/us/politics/coronavirus-vaccination.html>
- 759 34. Abdul-Mutakabbir JC, Casey S, Jews V, King A, Simmons K, Hogue MD, et al. A three-  
760 tiered approach to address barriers to COVID-19 vaccine delivery in the Black community.  
761 *Lancet Global Heal.* 2021;9: e749–e750. doi:10.1016/s2214-109x(21)00099-1

- 762 35. Centers for Disease Control and Prevention. Vaccine-preventable diseases: improving  
763 vaccination coverage in children, adolescents, and adults. A report on recommendations from  
764 the Task Force on Community Preventive Services. *Morb Mortal Wkly Rep.* 1999;48:1–15.
- 765 36. Peterson P, McNabb P, Maddali SR, Heath J, Santibañez S. Engaging Communities to  
766 Reach Immigrant and Minority Populations: The Minnesota Immunization Networking Initiative  
767 (MINI), 2006-2017. *Public Health Rep.* 2019;134: 241–248. doi:10.1177/0033354919834579
- 768 37. Banerjee AV, Duflo E, Glennerster R, Kothari D. Improving immunisation coverage in rural  
769 India: clustered randomised controlled evaluation of immunisation campaigns with and without  
770 incentives. *Bmj.* 2010;340: c2220. doi:10.1136/bmj.c2220
- 771 38. Gottvall M, Tydén T, Höglund AT, Larsson M. Knowledge of human papillomavirus among  
772 high school students can be increased by an educational intervention. *Int J Std Aids.* 2010;21:  
773 558–562. doi:10.1258/ijsa.2010.010063
- 774 39. Jarrett C, Wilson R, O’Leary M, Eckersberger E, Larson HJ, Hesitancy the SWG on V.  
775 Strategies for addressing vaccine hesitancy – A systematic review. *Vaccine.* 2015;33: 4180–  
776 4190. doi:10.1016/j.vaccine.2015.04.040
- 777 40. MacDonald NE, Hesitancy the SWG on V. Vaccine hesitancy: Definition, scope and  
778 determinants. *Vaccine.* 2015;33: 4161–4164. doi:10.1016/j.vaccine.2015.04.036
- 779 41. Force TAHCT, Spleen AM, Kluhsman BC, Clark AD, Dignan MB, Lengerich EJ. An  
780 Increase in HPV-Related Knowledge and Vaccination Intent Among Parental and Non-parental  
781 Caregivers of Adolescent Girls, Age 9–17 Years, in Appalachian Pennsylvania. *J Cancer Educ.*  
782 2012;27: 312–319. doi:10.1007/s13187-011-0294-z
- 783 42. Hunter RF, Haye K de la, Murray JM, Badham J, Valente TW, Clarke M, et al. Social  
784 network interventions for health behaviours and outcomes: A systematic review and meta-  
785 analysis. *PLOS Med.* 2019;16: e1002890. doi:10.1371/journal.pmed.1002890
- 786 43. Vavreck L. \$100 as Incentive to Get a Shot? Experiment Suggests It Can Pay Off. *New*  
787 *York Times.* 4 Mar 2021. Available: [https://www.nytimes.com/2021/05/04/upshot/vaccine-](https://www.nytimes.com/2021/05/04/upshot/vaccine-incentive-experiment.html)  
788 [incentive-experiment.html](https://www.nytimes.com/2021/05/04/upshot/vaccine-incentive-experiment.html)
- 789 44. McNamara D. Winning Idea: Ohio Vaccine Lottery Shows Some Incentives May Work.  
790 *Medscape Medical News.* 18 May 2021.

791

**Table 1. Description of the “Motivate, Vaccinate, and Activate” Strategy to address predisposing, enabling and reinforcing factors to COVID-19 vaccination among low-income Latinx individuals.**

| Influencing factors                                                                                                 | Barriers to COVID-19 vaccination                                                                                                                                                                                                                                                                                                                                                                                                                                                                                                                                                                                                                                                                                                                                                                                                                                                                                                                 | Strategy component                                                                            | Description of intervention activities that directly address barriers                                                                                                                                                                                                                                                                                                                                                                                                                                                                                                                                                                                                                                                                                                                                                                                                                                                                                                                                                                                                                                                                                                                                                                                                                                                                                                                                                                                                                                                                                                                                                                          |
|---------------------------------------------------------------------------------------------------------------------|--------------------------------------------------------------------------------------------------------------------------------------------------------------------------------------------------------------------------------------------------------------------------------------------------------------------------------------------------------------------------------------------------------------------------------------------------------------------------------------------------------------------------------------------------------------------------------------------------------------------------------------------------------------------------------------------------------------------------------------------------------------------------------------------------------------------------------------------------------------------------------------------------------------------------------------------------|-----------------------------------------------------------------------------------------------|------------------------------------------------------------------------------------------------------------------------------------------------------------------------------------------------------------------------------------------------------------------------------------------------------------------------------------------------------------------------------------------------------------------------------------------------------------------------------------------------------------------------------------------------------------------------------------------------------------------------------------------------------------------------------------------------------------------------------------------------------------------------------------------------------------------------------------------------------------------------------------------------------------------------------------------------------------------------------------------------------------------------------------------------------------------------------------------------------------------------------------------------------------------------------------------------------------------------------------------------------------------------------------------------------------------------------------------------------------------------------------------------------------------------------------------------------------------------------------------------------------------------------------------------------------------------------------------------------------------------------------------------|
| <p><b>Predisposing</b><br/>(Knowledge, attitudes, beliefs, skills, values, self-efficacy)</p>                       | <p>Questions and concerns about vaccine safety and efficacy:</p> <ul style="list-style-type: none"> <li>Vaccine efficacy and impact on transmission.</li> <li>Short- and long-term side-effects and safety</li> <li>Speed of development and approval process.</li> </ul> <p>Trust:</p> <ul style="list-style-type: none"> <li>Concerns about impact on public charge and immigration status.</li> <li>Mistrust of healthcare systems or government.</li> </ul> <p>Knowledge and awareness of eligibility requirements:</p> <ul style="list-style-type: none"> <li>Unsure when eligible and whether proof of eligibility needed.</li> <li>Questions about whether eligibility applied to people with comorbid conditions.</li> <li>Questions about whether people with history of COVID-19 were eligible.</li> <li>Unsure where to get the COVID-19 vaccine.</li> <li>Availability of language concordant messaging and registration.</li> </ul> | <p><b>Motivate</b><br/>(Community mobilization and demand generation activities)</p>          | <ul style="list-style-type: none"> <li>Trusted and known bilingual or monolingual Spanish-speaking Latinx community members provided direct outreach, including going door-to-door to businesses and senior living facilities, giving interviews on Spanish language radio shows, and hosting vaccine townhalls to raise awareness about vaccine eligibility, provide vaccine-related education and raise awareness about the UeS vaccination site.</li> <li>Community health workers provided face-to-face outreach and vaccine education hand-outs to people attending UeS neighborhood COVID-19 testing site starting one-month before the vaccination site opened.</li> <li>Community-based organizations able to directly schedule eligible persons that they service (e.g., able to gather and submit list of older clients who wanted to receive a vaccine).</li> <li>Sunday ‘Cafecitos’ across from vaccination site where community members could walk up and ask questions to Latinx physicians while enjoying pan dulce and coffee.</li> <li>Text messages and site information sent to all clients who had ever been tested for COVID-19 at UeS community site as soon as they became eligible for COVID-19 vaccination.</li> <li>Dissemination of information about benefits of vaccination, UeS vaccination site and eligibility via posters in the community, social media, community websites, local Spanish language radio stations and newspapers. These were updated throughout the implementation period as eligibility criteria changed.</li> <li>Direct, vaccination referral from UeS COVID-19 testing site.</li> </ul> |
|                                                                                                                     |                                                                                                                                                                                                                                                                                                                                                                                                                                                                                                                                                                                                                                                                                                                                                                                                                                                                                                                                                  | <p><b>Vaccinate</b><br/>(Community-based, low-barrier, client-centered, vaccination site)</p> | <ul style="list-style-type: none"> <li>Vaccination site co-developed and run in partnership between trusted community-led organization (LTF) and UCSF which has deep roots in the community, working hand-in-hand to provide COVID-19 services since April 2020.</li> <li>All site staff provided COVID-19 vaccine-related education and regular refresher trainings to be able to answer any community member/client questions or address any concerns.</li> <li>Site staff largely mono- or bilingual Spanish speaking and all trained and refreshed on good customer service principles.</li> </ul>                                                                                                                                                                                                                                                                                                                                                                                                                                                                                                                                                                                                                                                                                                                                                                                                                                                                                                                                                                                                                                         |
|                                                                                                                     |                                                                                                                                                                                                                                                                                                                                                                                                                                                                                                                                                                                                                                                                                                                                                                                                                                                                                                                                                  | <p><b>Activate</b><br/>(Leverage social networks to increase vaccine uptake)</p>              | <ul style="list-style-type: none"> <li>Peer vaccine ambassadors speak with unvaccinated friends and family to provide COVID-19 vaccine, including its benefits, share their positive experiences at the neighborhood site, share information about how/where to register for vaccination at the neighborhood site, and recommend that they get vaccinated.</li> </ul>                                                                                                                                                                                                                                                                                                                                                                                                                                                                                                                                                                                                                                                                                                                                                                                                                                                                                                                                                                                                                                                                                                                                                                                                                                                                          |
| <p><b>Enabling</b><br/>(Availability and accessibility of resources, policies, laws)</p>                            | <ul style="list-style-type: none"> <li>No mobile phone/computer access to schedule vaccination appointments online.</li> <li>Difficult to navigate online vaccination appointments.</li> <li>Requirement to prove residency or vaccine eligibility for scheduling.</li> <li>Requirement to prove eligibility.</li> <li>No personal transportation.</li> <li>Direct + indirect costs of time required to get scheduled and vaccinated (financial insecurity).</li> <li>Lack of language/culturally-concordant messaging, registration and vaccination services.</li> <li>No health insurance or not linked to primary healthcare services.</li> </ul>                                                                                                                                                                                                                                                                                             | <p><b>Vaccinate</b><br/>(Community-based, low-barrier, client-centered, vaccination site)</p> | <ul style="list-style-type: none"> <li>Vaccination site is community-based and conveniently located near a busy transport hub – “in the neighborhood.”</li> <li>Outdoor, welcoming environment with all site staff well-trained and refreshed on good customer service principles, emphasizing kindness and helpfulness.</li> <li>Culturally-tailored site with bicultural, bilingual staff, many of whom are local community members.</li> <li>Low-barrier scheduling features included: <ul style="list-style-type: none"> <li>On-site registration 7 days a week</li> <li>Self-attestation of meeting eligibility requirements, no requirement to show an ID to prove residency, or to prove vaccine eligibility or health insurance status.</li> <li>Sunday appointments offered.</li> <li>Offering walk-up appointments over time.</li> </ul> </li> <li>Close collaboration with SFDPH to ensure consistent vaccine supply and avoid appointment cancellation.</li> </ul>                                                                                                                                                                                                                                                                                                                                                                                                                                                                                                                                                                                                                                                                 |
| <p><b>Reinforcing</b><br/>(Social support, influence of peers, family members, and general community attitudes)</p> | <ul style="list-style-type: none"> <li>Lack of friends, family members, and coworkers, who are vaccinated and can serve as credible source for vaccine-related knowledge and experiences.</li> <li>Lack of friends and family members loved ones/peers encouraging vaccination through empathy and support.</li> </ul>                                                                                                                                                                                                                                                                                                                                                                                                                                                                                                                                                                                                                           | <p><b>Activate</b><br/>(Leverage social networks to increase vaccine uptake)</p>              | <ul style="list-style-type: none"> <li>Community health team members approach clients while waiting for 15-30 minutes <u>after</u> their vaccination.</li> <li>Clients are counselled about side effects a person may expect.</li> <li>Clients are then provided additional education about COVID-19 vaccines and any vaccine-related questions are answered.</li> <li>Clients are then encouraged to reach out to unvaccinated family members and peers to provide COVID-19-related vaccine education, information about UeS vaccination site and personally recommend that they get vaccinated.</li> </ul>                                                                                                                                                                                                                                                                                                                                                                                                                                                                                                                                                                                                                                                                                                                                                                                                                                                                                                                                                                                                                                   |

**Table 2. Baseline characteristics of clients vaccinated at the Unidos en Salud neighborhood vaccination site, overall and according to ethnicity.**

|                                                       | <b>Overall<br/>(N=11,098)</b> | <b>Latinx<br/>(n=7,809)</b> | <b>Not Latinx<br/>(n=3,289)</b> |
|-------------------------------------------------------|-------------------------------|-----------------------------|---------------------------------|
| <b>Median age, IQR</b>                                | 43 (32-56)                    | 43 (32-55)                  | 43 (32-58)                      |
| <b>Age Category</b>                                   |                               |                             |                                 |
| 16-30                                                 | 2530 (22.8%)                  | 1814 (23.2%)                | 716 (21.8%)                     |
| 31-50                                                 | 4658 (42.0%)                  | 3353 (42.9%)                | 1305 (39.7%)                    |
| 50-64                                                 | 2617 (23.6%)                  | 1793 (23.0%)                | 824 (25.1%)                     |
| 65 and older                                          | 1293 (11.7%)                  | 849 (10.9%)                 | 444 (13.5%)                     |
| <b>Sex</b>                                            |                               |                             |                                 |
| Female                                                | 4926 (44.4%)                  | 3434 (44.0%)                | 1492 (45.4%)                    |
| Male                                                  | 5978 (53.9%)                  | 4303 (55.1%)                | 1675 (50.9%)                    |
| Non-binary/other                                      | 194 (1.7%)                    | 72 (0.9%)                   | 122 (3.7%)                      |
| <b>Immigration classification<sup>^</sup></b>         |                               |                             |                                 |
| First-generation immigrant                            | 149 (50.7%)                   | 121 (60.2%)                 | 28 (30.1%)                      |
| Second-generation immigrant                           | 42 (14.3%)                    | 29 (14.4%)                  | 13 (14.0%)                      |
| Neither first- or second-generation immigrant         | 103 (35.0%)                   | 51 (25.4%)                  | 52 (55.9%)                      |
| <b>Primary occupation<sup>^</sup></b>                 |                               |                             |                                 |
| Food and beverage                                     | 162 (16.6%)                   | 139 (21.3%)                 | 23 (7.10%)                      |
| Tradesperson, cleaning, personal services             | 161 (16.5%)                   | 136 (20.8%)                 | 25 (7.7%)                       |
| Finance, sales and technology                         | 140 (14.3%)                   | 43 (6.6%)                   | 97 (29.9%)                      |
| Retired/homemaker                                     | 41 (4.19%)                    | 33 (5.1%)                   | 8 (2.5%)                        |
| Unemployed                                            | 101 (10.3%)                   | 68 (10.4%)                  | 33 (10.2%)                      |
| Education                                             | 42 (4.3%)                     | 31 (4.7%)                   | 11 (3.4%)                       |
| Student                                               | 109 (11.1%)                   | 84 (12.8%)                  | 25 (7.7%)                       |
| Healthcare                                            | 22 (2.3%)                     | 11 (1.7%)                   | 11 (3.4%)                       |
| Other                                                 | 200 (20.4%)                   | 109 (16.7%)                 | 91 (28.1%)                      |
| <b>Annual household income<sup>^</sup></b>            |                               |                             |                                 |
| <\$50,000 per year                                    | 536 (61.0%)                   | 431 (76.1%)                 | 105 (33.5%)                     |
| \$50,000-100,000 per year                             | 199 (22.6%)                   | 107 (18.9%)                 | 92 (29.4%)                      |
| >\$100,000 per year                                   | 144 (16.4%)                   | 28 (5.0%)                   | 116 (37.1%)                     |
| <b>Health insurance<sup>^</sup></b>                   |                               |                             |                                 |
| Yes                                                   | 618 (63.1%)                   | 344 (52.7%)                 | 274 (84.0%)                     |
| No                                                    | 361 (36.9%)                   | 309 (47.3%)                 | 52 (16.0%)                      |
| <b>Health insurance type (if insured)<sup>^</sup></b> |                               |                             |                                 |
| Public                                                | 181 (29.5%)                   | 145 (42.6%)                 | 36 (13.1%)                      |
| Private                                               | 391 (63.7%)                   | 173 (50.9%)                 | 218 (79.6%)                     |
| Unsure                                                | 42 (6.84%)                    | 22 (6.5%)                   | 20 (7.3%)                       |
| <b>Primary care provider<sup>^</sup></b>              |                               |                             |                                 |
| Yes                                                   | 451 (46.3%)                   | 245 (37.6%)                 | 206 (63.8%)                     |
| No                                                    | 523 (53.7%)                   | 406 (62.4%)                 | 117 (36.2%)                     |

**Note:** Age, sex, and ethnicity are drawn from programmatic data among all vaccinated clients between February 1 and May 19<sup>th</sup>, 2021 (n=11,098). <sup>^</sup>Represents the results of a survey among vaccinated clients aged ≥16 years old conducted after their first or second vaccine dose between May 2 and 19<sup>th</sup>, 2021 (n=997).



**Table 3. Factors influencing and motivating clients to get vaccinated at the at the Unidos en Salud neighborhood site.**

|                                                                  | <b>Overall<br/>(n=997)</b> | <b>Latinx<br/>(n=669)</b> | <b>Not Latinx<br/>(n=328)</b> | <b>P-value</b> |
|------------------------------------------------------------------|----------------------------|---------------------------|-------------------------------|----------------|
| <b>How clients heard about the site</b>                          |                            |                           |                               |                |
| Told about it from a friend, family member, or co-worker         | 352 (36.1%)                | 248 (37.8%)               | 104 (32.6%)                   | <0.001         |
| Received an invitation on their phone                            | 205 (21.0%)                | 109 (16.6%)               | 96 (30.1%)                    |                |
| Passed by the site                                               | 174 (17.8%)                | 144 (22.0%)               | 30 (9.4%)                     |                |
| Referred from UeS testing site                                   | 111 (11.4%)                | 69 (10.5%)                | 42 (13.2%)                    |                |
| Told about it by a community volunteer at their business or home | 57 (5.9%)                  | 35 (5.3%)                 | 22 (6.9%)                     |                |
| Saw a flyer for the site in the community                        | 23 (2.4%)                  | 13 (2.0%)                 | 10 (3.1%)                     |                |
| Saw information in the news                                      | 9 (0.9%)                   | 7 (1.1%)                  | 2 (0.6%)                      |                |
| Saw information on social media                                  | 15 (1.5%)                  | 8 (1.2%)                  | 7 (2.2%)                      |                |
| Other                                                            | 29 (3.0%)                  | 23 (3.5%)                 | 6 (1.9%)                      |                |
| <b>Reasons clients chose the site</b>                            |                            |                           |                               |                |
| Located in their neighborhood                                    | 251 (29.0%)                | 170 (29.3%)               | 81 (28.5%)                    | <0.001         |
| Scheduling was easy, efficient and convenient                    | 231 (26.7%)                | 130 (22.4%)               | 101 (35.6%)                   |                |
| Someone they trusted either invited them or suggested it to them | 156 (18.0%)                | 111 (19.1%)               | 45 (15.8%)                    |                |
| Had a positive interaction with the UeS of LTF staff/volunteers  | 41 (4.7%)                  | 32 (5.5%)                 | 9 (3.2%)                      |                |
| Tried to get vaccinated somewhere else but was unsuccessful      | 37 (4.3%)                  | 19 (3.3%)                 | 18 (6.3%)                     |                |
| They were not aware of other options                             | 46 (5.3%)                  | 37 (6.4%)                 | 9 (3.2%)                      |                |
| Staff was bilingual                                              | 48 (5.6%)                  | 45 (7.8%)                 | 3 (1.1%)                      |                |
| Prior positive experience at UeS neighborhood testing site       | 40 (4.6%)                  | 28 (4.8%)                 | 12 (4.2%)                     |                |
| Other                                                            | 15 (1.7%)                  | 9 (1.6%)                  | 6 (2.1%)                      |                |

**Note:** All data is drawn from a survey among vaccinated clients aged  $\geq 16$  years old conducted after their first or second vaccine dose between May 2 and 19<sup>th</sup>, 2021 (n=997).



**Table 4. Adaptations to the “Motivate, Vaccinate and Activate” strategy components during the implementation period from February 1 through May 19, 2021.**

| Strategy component                                                                    | Original design / aim                                                                                                                                                 | Description of adaptation(s) made                                                                                                                                                                                                                                                                                                                                                                                                                                                                                                                                                                                                                                    | Was adaptation planned or unplanned? | When was adaptation made?            | Why was adaptation made?                                                                                                                                                                  |
|---------------------------------------------------------------------------------------|-----------------------------------------------------------------------------------------------------------------------------------------------------------------------|----------------------------------------------------------------------------------------------------------------------------------------------------------------------------------------------------------------------------------------------------------------------------------------------------------------------------------------------------------------------------------------------------------------------------------------------------------------------------------------------------------------------------------------------------------------------------------------------------------------------------------------------------------------------|--------------------------------------|--------------------------------------|-------------------------------------------------------------------------------------------------------------------------------------------------------------------------------------------|
| <b>Motivate</b><br>(Community mobilization and demand generation activities)          | Multi-method outreach approach to mobilize community members and generate demand for COVID-19 vaccination.                                                            | <ul style="list-style-type: none"> <li>• We initially focused on direct recruitment from CBO networks, those eligible on our testing lists, and in-person registration at the site (capitalizing on it being located at a busy transport hub).</li> <li>• As eligibility expanded, we began undertaking direct sign ups at other sites (i.e., food hubs, grocery stores).</li> <li>• We also began providing flyers/cards with QR codes to sign-up for vaccination at key locations (i.e., food hubs, school drop off/pick up)</li> <li>• Later, we began promoting a direct sign-up link (e.g., via community signage, websites) for anyone to register.</li> </ul> | Planned                              | Throughout the implementation period | <ul style="list-style-type: none"> <li>• To address changing vaccine eligibility.</li> <li>• To maintain demand for vaccination.</li> </ul>                                               |
| <b>Vaccinate</b><br>(Community-based, low-barrier, client-centered, vaccination site) | Provide vaccinations 4 days a week without any unplanned closures in order to avoid the inconvenience of rescheduling among socioeconomically vulnerable individuals. | <ul style="list-style-type: none"> <li>• Infrequently needed to close the site on a planned operating day</li> </ul>                                                                                                                                                                                                                                                                                                                                                                                                                                                                                                                                                 | Unplanned                            | Throughout the implementation period | <ul style="list-style-type: none"> <li>• To be responsive to events affecting local community (i.e., George Floyd verdict)</li> <li>• No closures due to vaccine stock-out.</li> </ul>    |
|                                                                                       | We aimed to provide evening hours to facilitate improved access to those who work.                                                                                    | <ul style="list-style-type: none"> <li>• Unable to provide evening hours (site open 9am-4pm)</li> </ul>                                                                                                                                                                                                                                                                                                                                                                                                                                                                                                                                                              | Unplanned                            | Early                                | <ul style="list-style-type: none"> <li>• Given outdoor, community location, evening hours were not felt to be safe.</li> </ul>                                                            |
|                                                                                       | In-person scheduling co-located at the UeS neighborhood vaccination site in order to improve convenience.                                                             | <ul style="list-style-type: none"> <li>• In-person scheduling moved to UeS neighborhood testing site.</li> </ul>                                                                                                                                                                                                                                                                                                                                                                                                                                                                                                                                                     | Unplanned                            | Early                                | <ul style="list-style-type: none"> <li>• To reduce congestion.</li> <li>• To improve efficiency (many direct referrals from testing site).</li> </ul>                                     |
|                                                                                       | Provide timely vaccination to all eligible community members who desired to be vaccinated at neighborhood site.                                                       | <ul style="list-style-type: none"> <li>• Provided vaccination referrals to local safety net hospital.</li> <li>• We worked closely with local hospital staff to utilize open same- and next-day appointments.</li> <li>• Referred clients provided transport if needed</li> <li>• Referred clients either escorted by or met at hospital by UeS site to provide support.</li> </ul>                                                                                                                                                                                                                                                                                  | Unplanned                            | Early-middle                         | <ul style="list-style-type: none"> <li>• At times demand outpaced timely appointments available.</li> <li>• To get motivated community members vaccinated as soon as possible.</li> </ul> |
|                                                                                       | Only on-site, in-person registration offered in order to prioritize access for those without computer access/skills.                                                  | <ul style="list-style-type: none"> <li>• On-line registration offered</li> </ul>                                                                                                                                                                                                                                                                                                                                                                                                                                                                                                                                                                                     | Unplanned                            | Late                                 | <ul style="list-style-type: none"> <li>• To address changing vaccine eligibility.</li> <li>• To maintain demand for vaccination.</li> </ul>                                               |

**Table 5. Behavior change outcomes associated with the effectiveness of the “Motivate, Vaccinate and Activate” strategy.**

|                                                                                                                                                   | <b>Overall<br/>(n=997)</b> | <b>Latinx<br/>(n=669)</b> | <b>Not Latinx<br/>(n=328)</b> | <b>P-value</b> |
|---------------------------------------------------------------------------------------------------------------------------------------------------|----------------------------|---------------------------|-------------------------------|----------------|
| <b>Had the neighborhood vaccination site not existed, when would you have been vaccinated?</b>                                                    |                            |                           |                               |                |
| Later                                                                                                                                             | 565 (58.4%)                | 366 (56.1%)               | 199 (63.2%)                   | 0.013          |
| About the same time                                                                                                                               | 335 (34.6%)                | 231 (35.4%)               | 104 (33.0%)                   |                |
| Earlier                                                                                                                                           | 67 (6.9%)                  | 55 (8.4%)                 | 12 (3.8%)                     |                |
| <b>After your experience at the UeS site, were you more likely to recommend vaccination to family members, friends or co-workers?<sup>^</sup></b> |                            |                           |                               |                |
| Yes                                                                                                                                               | 450 (89.1%)                | 272 (90.1%)               | 178 (87.7%)                   | 0.49           |
| No                                                                                                                                                | 55 (10.9%)                 | 30 (9.9%)                 | 25 (12.3%)                    |                |
| <b>Since getting vaccinated at the UeS site, how many people have you reached out to get vaccinated?<sup>^</sup></b>                              |                            |                           |                               |                |
| 0                                                                                                                                                 | 40 (9.0%)                  | 20 (7.4%)                 | 20 (11.4%)                    | 0.21           |
| 1-2                                                                                                                                               | 131 (29.4%)                | 74 (27.3%)                | 57 (32.6%)                    |                |
| 3-5                                                                                                                                               | 151 (33.9%)                | 99 (36.5%)                | 52 (29.7%)                    |                |
| 6-10                                                                                                                                              | 51 (11.4%)                 | 35 (12.9%)                | 16 (9.1%)                     |                |
| >10                                                                                                                                               | 73 (16.4%)                 | 43 (15.9%)                | 30 (17.1%)                    |                |
| <b>How many previously unvaccinated people are you aware of that got vaccinated after you recommended it to them?<sup>^</sup></b>                 |                            |                           |                               |                |
| 0                                                                                                                                                 | 66 (17.0%)                 | 30 (12.5%)                | 36 (24.3%)                    | 0.035          |
| 1-2                                                                                                                                               | 156 (40.2%)                | 98 (40.8%)                | 58 (39.2%)                    |                |
| 3-5                                                                                                                                               | 93 (24.0%)                 | 65 (27.1%)                | 28 (18.9%)                    |                |
| 6-10                                                                                                                                              | 34 (8.8%)                  | 22 (9.2%)                 | 12 (8.1%)                     |                |
| >10                                                                                                                                               | 39 (10.1%)                 | 25 (10.4%)                | 14 (9.5%)                     |                |

**Note:** All data is drawn from a survey among vaccinated clients aged  $\geq 16$  years old conducted after their first or second vaccine dose between May 2 and 19<sup>th</sup>, 2021 (n=997). <sup>^</sup> Responses limited to among participants completing the survey after their second vaccine dose (n=729).

**Supplementary Table 1. Characteristics of individuals who were registered for vaccination at the Unidos en Salud vaccination site between February 1 and May 19, 2021, according to whether they did or did not receive at least one vaccine dose at the Unidos en Salud vaccination site.**

|                        | <b>Registered for vaccination at UeS site (n=12,103)</b> | <b>Received at least one vaccine dose at UeS site (n=11,098)</b> | <b>Did not receive at least one vaccine dose at UeS site (n=1,005)</b> |
|------------------------|----------------------------------------------------------|------------------------------------------------------------------|------------------------------------------------------------------------|
| <b>Median age, IQR</b> | 43 (32-56)                                               | 43 (32-56)                                                       | 42 (30-54)                                                             |
| <b>Age Category</b>    |                                                          |                                                                  |                                                                        |
| 16-30                  | 2796 (100%)                                              | 2530 (90.5%)                                                     | 266 (9.5%)                                                             |
| 31-50                  | 5064 (100%)                                              | 4658 (92.0%)                                                     | 406 (8.0%)                                                             |
| 50-64                  | 2850 (100%)                                              | 2617 (91.8%)                                                     | 233 (8.2%)                                                             |
| 65 and older           | 1393 (100%)                                              | 1293 (92.8%)                                                     | 100 (7.2%)                                                             |
| <b>Sex</b>             |                                                          |                                                                  |                                                                        |
| Male                   | 5423 (100%)                                              | 4926 (90.8%)                                                     | 497 (9.2%)                                                             |
| Female                 | 6469 (100%)                                              | 5978 (92.4%)                                                     | 491 (7.6%)                                                             |
| Non-binary/other       | 211 (100%)                                               | 194 (91.9%)                                                      | 17 (8.1%)                                                              |
| <b>Ethnicity</b>       |                                                          |                                                                  |                                                                        |
| Latinx                 | 8458 (100%)                                              | 7809 (92.3%)                                                     | 649 (7.7%)                                                             |
| White                  | 1716 (100%)                                              | 1581 (92.1%)                                                     | 135 (7.9%)                                                             |
| Asian                  | 959 (100%)                                               | 852 (88.8%)                                                      | 107 (11.3%)                                                            |
| Black                  | 313 (100%)                                               | 269 (85.9%)                                                      | 44 (14.1%)                                                             |
| Other                  | 657 (100%)                                               | 587 (89.3%)                                                      | 70 (10.7%)                                                             |

Note: proportions represent row percentages.

**Supplementary Table 2.** Geographic residence of clients receiving at least one vaccine dose at the Unidos en Salud neighborhood vaccination site between February 1 and May 19, 2021 according to zip code.

|                              | <b>Overall<br/>(n=11,098)</b> | <b>Latinx<br/>(n=7,809)</b> | <b>Not Latinx<br/>(n=3,289)</b> |
|------------------------------|-------------------------------|-----------------------------|---------------------------------|
| <b>Zip code</b>              |                               |                             |                                 |
| 94110                        | 3590 (100%)                   | 2484 (69.2%)                | 1106 (30.8%)                    |
| 94112                        | 1453 (100%)                   | 1242 (85.5%)                | 211 (14.5%)                     |
| 94124                        | 452 (100%)                    | 366 (81.0%)                 | 86 (19.0%)                      |
| 94102                        | 344 (100%)                    | 274 (79.7%)                 | 70 (20.3%)                      |
| 94134                        | 492 (100%)                    | 407 (82.7%)                 | 85 (17.3%)                      |
| 94103                        | 499 (100%)                    | 356 (71.3%)                 | 143 (28.7%)                     |
| Other San Francisco/Bay Area | 4268 (100%)                   | 2680 (62.8%)                | 1588 (37.2%)                    |

Note: proportions represent row percentages

**Supplementary Table 3. Characteristics of individuals who were offered participation in the on-site post-vaccination survey, according to whether they did or did not agree to complete the survey. All surveys were completed between May 2 and May 19<sup>th</sup>, 2021.**

|                        | <b>Offered survey<br/>(n=3,597)</b> | <b>Completed survey<br/>(n=997)</b> | <b>Declined survey<br/>(n=2,540)</b> |
|------------------------|-------------------------------------|-------------------------------------|--------------------------------------|
| <b>Median age, IQR</b> | 37 (27-48)                          | 35 (26-46)                          | 38 (28-49)                           |
| <b>Age Category</b>    |                                     |                                     |                                      |
| 16-30                  | 1154 (32.6%)                        | 384 (38.5%)                         | 770 (30.3%)                          |
| 31-50                  | 1676 (47.4%)                        | 430 (43.1%)                         | 1246 (49.1%)                         |
| 50-64                  | 580 (16.4%)                         | 163 (16.3%)                         | 417 (16.4%)                          |
| 65 and older           | 127 (3.6%)                          | 20 (2.0%)                           | 107 (4.2%)                           |
| <b>Sex</b>             |                                     |                                     |                                      |
| Male                   | 2130 (60.2%)                        | 575 (57.7%)                         | 1555 (61.2%)                         |
| Female                 | 1359 (38.4%)                        | 409 (41.0%)                         | 950 (37.4%)                          |
| Non-binary/other       | 48 (1.36%)                          | 13 (1.3%)                           | 35 (1.38%)                           |
| <b>Ethnicity</b>       |                                     |                                     |                                      |
| Latinx                 | 2632 (74.4%)                        | 669 (67.1%)                         | 1963 (77.3%)                         |
| White                  | 427 (12.1%)                         | 163 (16.3%)                         | 264 (10.4%)                          |
| Asian                  | 242 (6.8%)                          | 83 (8.3%)                           | 159 (6.3%)                           |
| Black                  | 80 (2.3%)                           | 25 (2.5%)                           | 55 (2.2%)                            |
| Other                  | 156 (4.4%)                          | 57 (5.7%)                           | 99 (3.9%)                            |

**Supplementary Table 4. Acceptability measures associated with the Unidos en Salud vaccination site.**

|                                                                                 | <b>Overall<br/>(n=997)</b> | <b>Latinx<br/>(n=669)</b> | <b>Not Latinx<br/>(n=328)</b> | <b>P-value</b> |
|---------------------------------------------------------------------------------|----------------------------|---------------------------|-------------------------------|----------------|
| <b>Clients stating they would recommend the UeS vaccination site to others</b>  |                            |                           |                               |                |
| Yes                                                                             | 954 (98.6%)                | 643 (98.2%)               | 311 (99.4%)                   | 0.25           |
| No                                                                              | 14 (1.5%)                  | 12 (1.8%)                 | 2 (0.6%)                      |                |
| <b>Who would you recommend this site to?</b>                                    |                            |                           |                               |                |
| Family members                                                                  | 782 (82.1%)                | 524 (81.6%)               | 258 (83.0%)                   | 0.970          |
| Friends                                                                         | 805 (84.5%)                | 511 (79.6%)               | 294 (94.5%)                   | <0.001         |
| Co-workers                                                                      | 639 (67.1%)                | 400 (62.3%)               | 239 (76.8%)                   | <0.001         |
| <b>Features of the UeS vaccination that clients liked the most (top choice)</b> |                            |                           |                               |                |
| Fast and efficient                                                              | 284 (32.8%)                | 161 (27.5%)               | 123 (44.1%)                   | <0.001         |
| Friendly and professional staff                                                 | 349 (40.3%)                | 268 (45.7%)               | 81 (29.0%)                    |                |
| Bilingual staff                                                                 | 62 (7.2%)                  | 58 (9.9%)                 | 4 (1.4%)                      |                |
| Staff were available and able to answer questions                               | 14 (1.6%)                  | 11 (1.9%)                 | 3 (1.1%)                      |                |
| Getting vaccinated in their community                                           | 77 (8.9%)                  | 42 (7.2%)                 | 35 (12.5%)                    |                |
| Getting vaccinated outside of a formal healthcare setting                       | 13 (1.5%)                  | 6 (1.0%)                  | 7 (2.5%)                      |                |
| Ease of booking 2 <sup>nd</sup> appointment                                     | 32 (3.7%)                  | 16 (2.7%)                 | 16 (5.7%)                     |                |
| No requirement to show documentation                                            | 30 (3.5%)                  | 20 (3.4%)                 | 10 (3.6%)                     |                |
| Other                                                                           | 4 (0.5%)                   | 4 (0.7%)                  | 0                             |                |
| <b>Features of the UeS vaccination that clients liked the most (choose all)</b> |                            |                           |                               |                |
| Fast and efficient                                                              | 694 (69.6%)                | 421 (62.9%)               | 273 (83.2%)                   | <0.001         |
| Friendly and professional staff                                                 | 854 (85.7%)                | 558 (83.4%)               | 296 (90.2%)                   | 0.005          |
| Bilingual staff                                                                 | 497 (49.8%)                | 368 (55.0%)               | 129 (39.3%)                   | <0.001         |
| Staff were available and able to answer questions                               | 373 (37.4%)                | 226 (33.8%)               | 147 (44.8%)                   | <0.001         |
| Getting vaccinated in their community                                           | 428 (42.9%)                | 252 (37.7%)               | 176 (53.7%)                   | <0.001         |
| Getting vaccinated outside of a formal healthcare setting                       | 259 (26%)                  | 141 (21.1%)               | 118 (36.0%)                   | <0.001         |
| Ease of booking 2 <sup>nd</sup> appointment                                     | 492 (49.3%)                | 273 (40.8%)               | 219 (66.8%)                   | <0.001         |
| No requirement to show documentation of residency or vaccine eligibility        | 276 (27.7%)                | 176 (26.3%)               | 100 (30.5%)                   | 0.19           |
| Other                                                                           | 6 (0.6%)                   | 3 (0.4%)                  | 3 (0.9%)                      | 0.40           |

**Note:** All data is drawn from a survey among vaccinated clients aged ≥16 years old conducted after their first or second vaccine dose between May 2 and 19<sup>th</sup>, 2021 (n=997).

**Supplementary Table 5. Characteristics of clients receiving at least one vaccine dose at the Unidos en Salud vaccination site between February 1 and April 21, 2021 according to whether they completed both vaccine doses.**

|                     | <b>Total clients receiving at least one dose (n=9,305)</b> | <b>Completed both doses (n=9,152)</b> | <b>Did not complete both doses (n=153)</b> |
|---------------------|------------------------------------------------------------|---------------------------------------|--------------------------------------------|
| <b>Age Category</b> |                                                            |                                       |                                            |
| 16-30               | 1900 (100%)                                                | 1865 (98.2%)                          | 35 (1.8%)                                  |
| 31-50               | 3822 (100%)                                                | 3752 (98.2%)                          | 70 (1.8%)                                  |
| 50-64               | 2353 (100%)                                                | 2321 (98.6%)                          | 32 (1.4%)                                  |
| 65 and older        | 1230 (100%)                                                | 1214 (98.8%)                          | 16 (1.2%)                                  |
| <b>Sex</b>          |                                                            |                                       |                                            |
| Male                | 4272 (100%)                                                | 4221 (98.8%)                          | 51 (1.2%)                                  |
| Female              | 4851 (100%)                                                | 4755 (97.8%)                          | 96 (2.2%)                                  |
| Non-binary/other    | 182 (100%)                                                 | 176 (96.7%)                           | 6 (3.3%)                                   |
| <b>Ethnicity</b>    |                                                            |                                       |                                            |
| Latinx              | 6313 (100%)                                                | 6207 (98.3%)                          | 106 (1.7%)                                 |
| White               | 1476 (100%)                                                | 1453 (98.4%)                          | 23 (1.6%)                                  |
| Asian               | 760 (100%)                                                 | 751 (98.8%)                           | 9 (1.2%)                                   |
| Black               | 230 (100%)                                                 | 227 (98.7%)                           | 3 (1.3%)                                   |
| Other               | 526 (100%)                                                 | 514 (97.7%)                           | 12 (2.3%)                                  |

Note: Analysis is censored after April 21, 2021 in order to allow all clients equal opportunity to accrue 4 weeks of follow-up time after their first vaccine dose at the neighborhood vaccination site. There were 1,780 people excluded who received their 1<sup>st</sup> dose after April 21, 2021 and 13 excluded who received only their second dose at the neighborhood site.



## Figure Legends

**Figure 1.** Overview of the “Motivate, Vaccinate and Activate” Strategy to increase vaccine uptake among Latinx community members living in San Francisco.

**Figure 2.** Photographs taken during the implementation period of the “Motivate, Vaccinate and Activate”. Panel A shows an example of flyers promoting COVID-19 vaccination at the Unidos en Salud neighborhood site, posted in English and Spanish. Panel B shows the registration area of the Unidos en Salud low-barrier vaccination site. Panel C shows the Unidos en Salud COVID-19 testing site directly across from the vaccination site. Community members could make vaccination appointments and were also encouraged to drop-in for same-day vaccination. Community members could ask site staff questions about the COVID-19 vaccine and were provided handouts about the COVID-19 vaccine. Panel D shows the waiting area of the Unidos en Salud low-barrier vaccination site where clients were provided education on possible COVID-19 side effects and were also ‘activated’ to the community health team to become vaccine ambassadors to reach out to their unvaccinated family members, friends and co-workers.

**Figure 3.** The ethnic composition of clients vaccinated at the Unidos en Salud neighborhood site (n=11,098) compared to the ethnic composition of the Mission District (n=62,452) among persons at least 16 years of age.

**Figure 4.** Map of San Francisco and the greater South Bay Area demonstrating the number of clients vaccinated at the Unidos en Salud neighborhood vaccination site according to their zip code of residence. The large majority of vaccinated clients living outside of San Francisco work in the Mission District.

**Figure 5.** Features of the Unidos en Salud neighborhood vaccination site that clients said that they liked or appreciated stratified according to ethnicity. Panel A shows the features that clients liked the most (can choose only one) while Panel B shows all of the features that clients stated that they liked.

**Figure 6.** Temporal trends in vaccinations at the Unidos en Salud neighborhood vaccination site during the 16-week implementation period from February 1 to May 19, 2021. Panel A shows the number of vaccinations that were administered each week according to eligibility criteria indication. Panel B shows the proportion of all vaccinations each week that were administered to Latinx persons; this provides measure of how effectively Latinx individuals were reached throughout the entirety of the implementation period.

**Supplementary Figure 1.** Map of San Francisco according to cumulative COVID-19 cases (rate per 10,000 residents) according to neighborhood. Darker blue shading indicates a higher cumulative prevalence of COVID-19 in a given neighborhood. The pink dot indicates the location of the Unidos en Salud neighborhood vaccination site.

# Figure 1.

**1. Pre-vaccination:**  
Undertake community mobilization  
COVID-19 vaccine demand  
generation activities

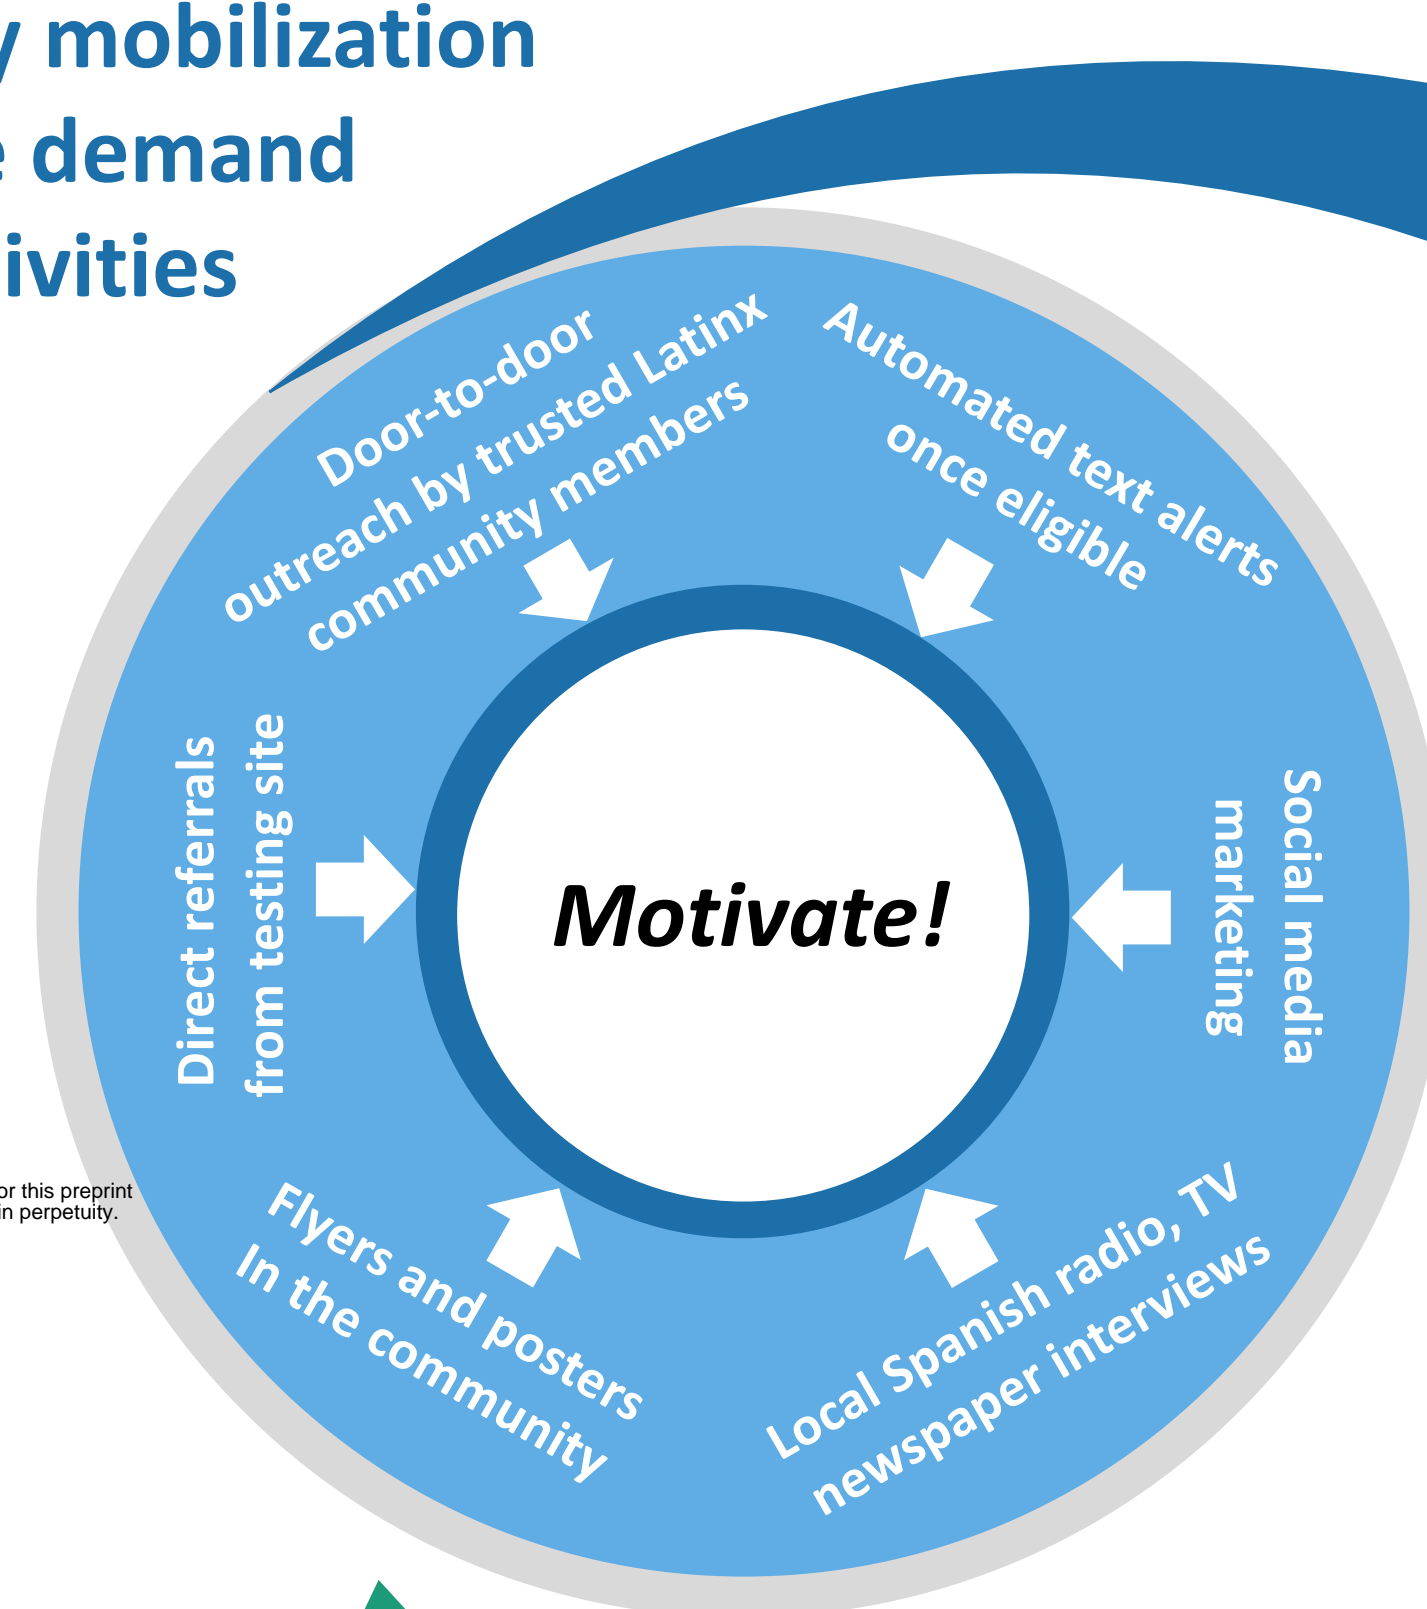

**2. Vaccination:**  
Implement and maintain a  
low-barrier, client-centered  
community-based  
COVID-19 vaccination site

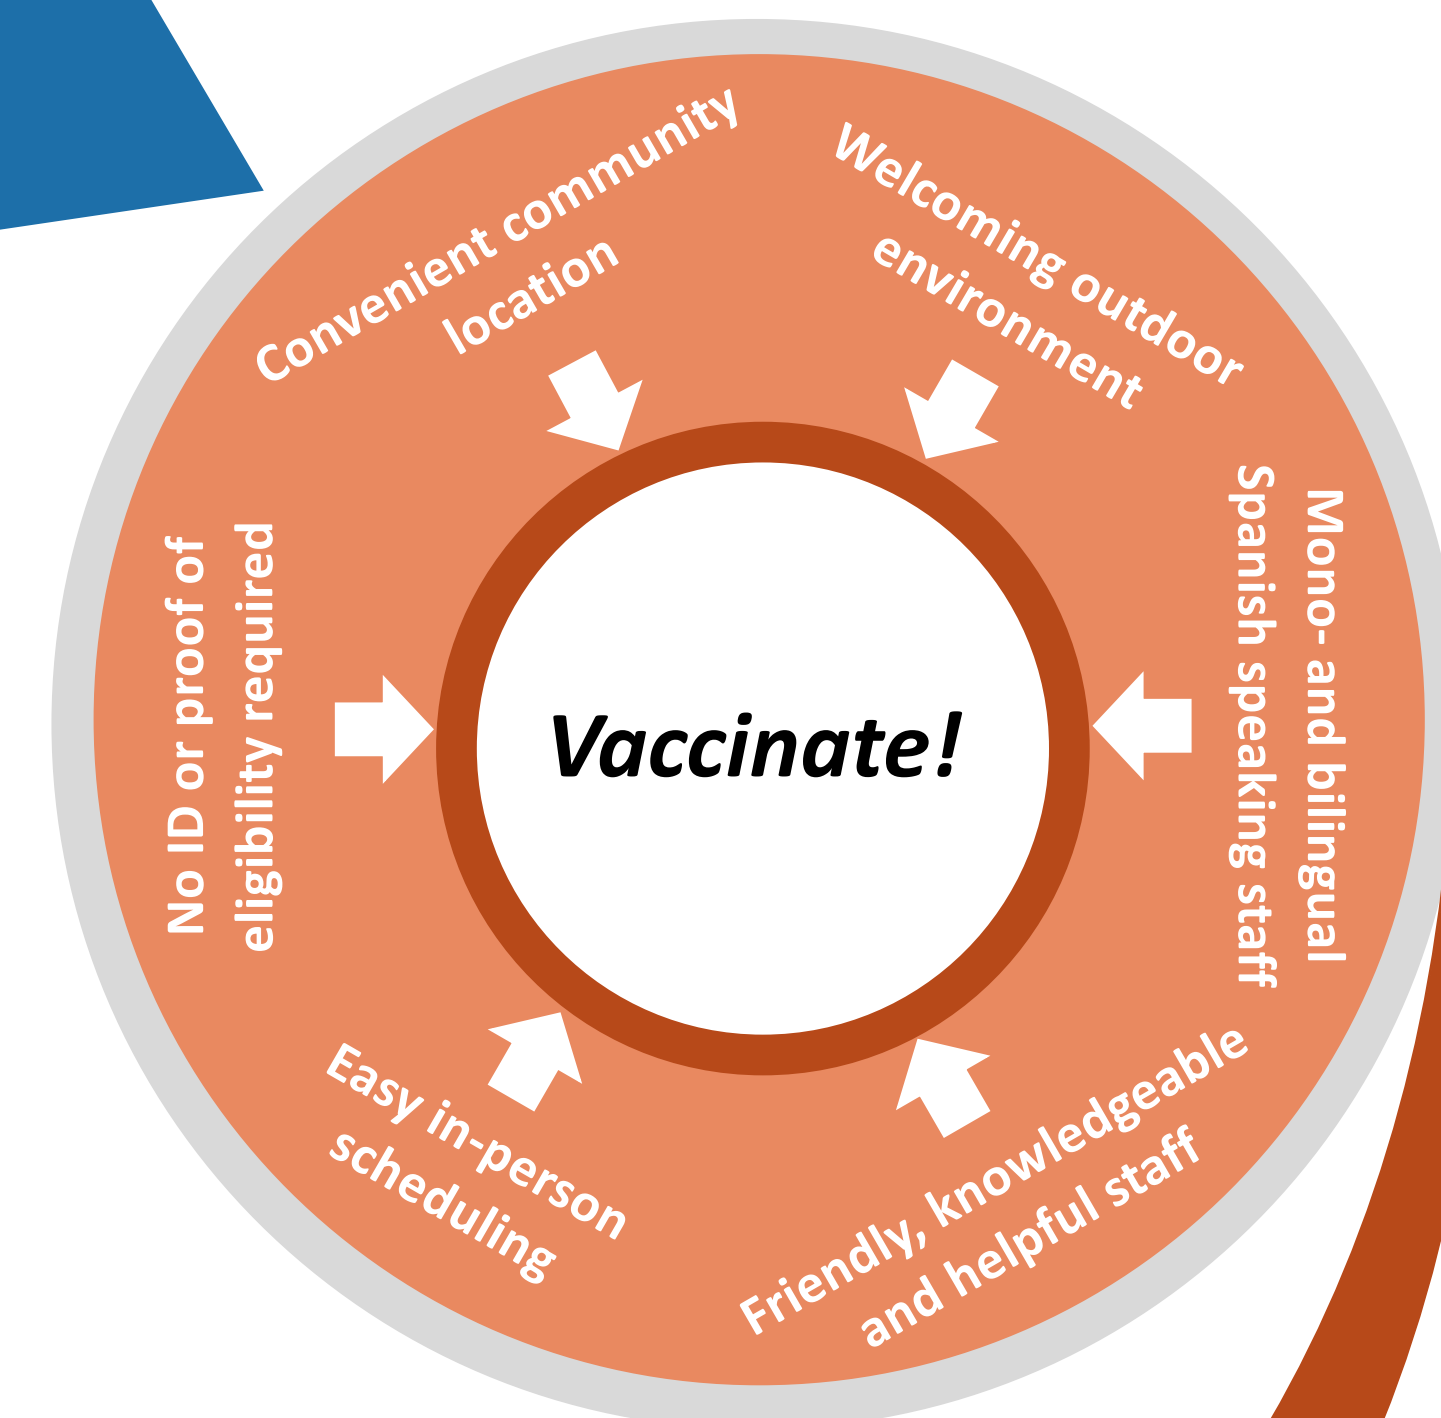

**3. Post-vaccination:**  
Leverage social networks to  
increase trust and uptake of  
COVID-19 vaccine

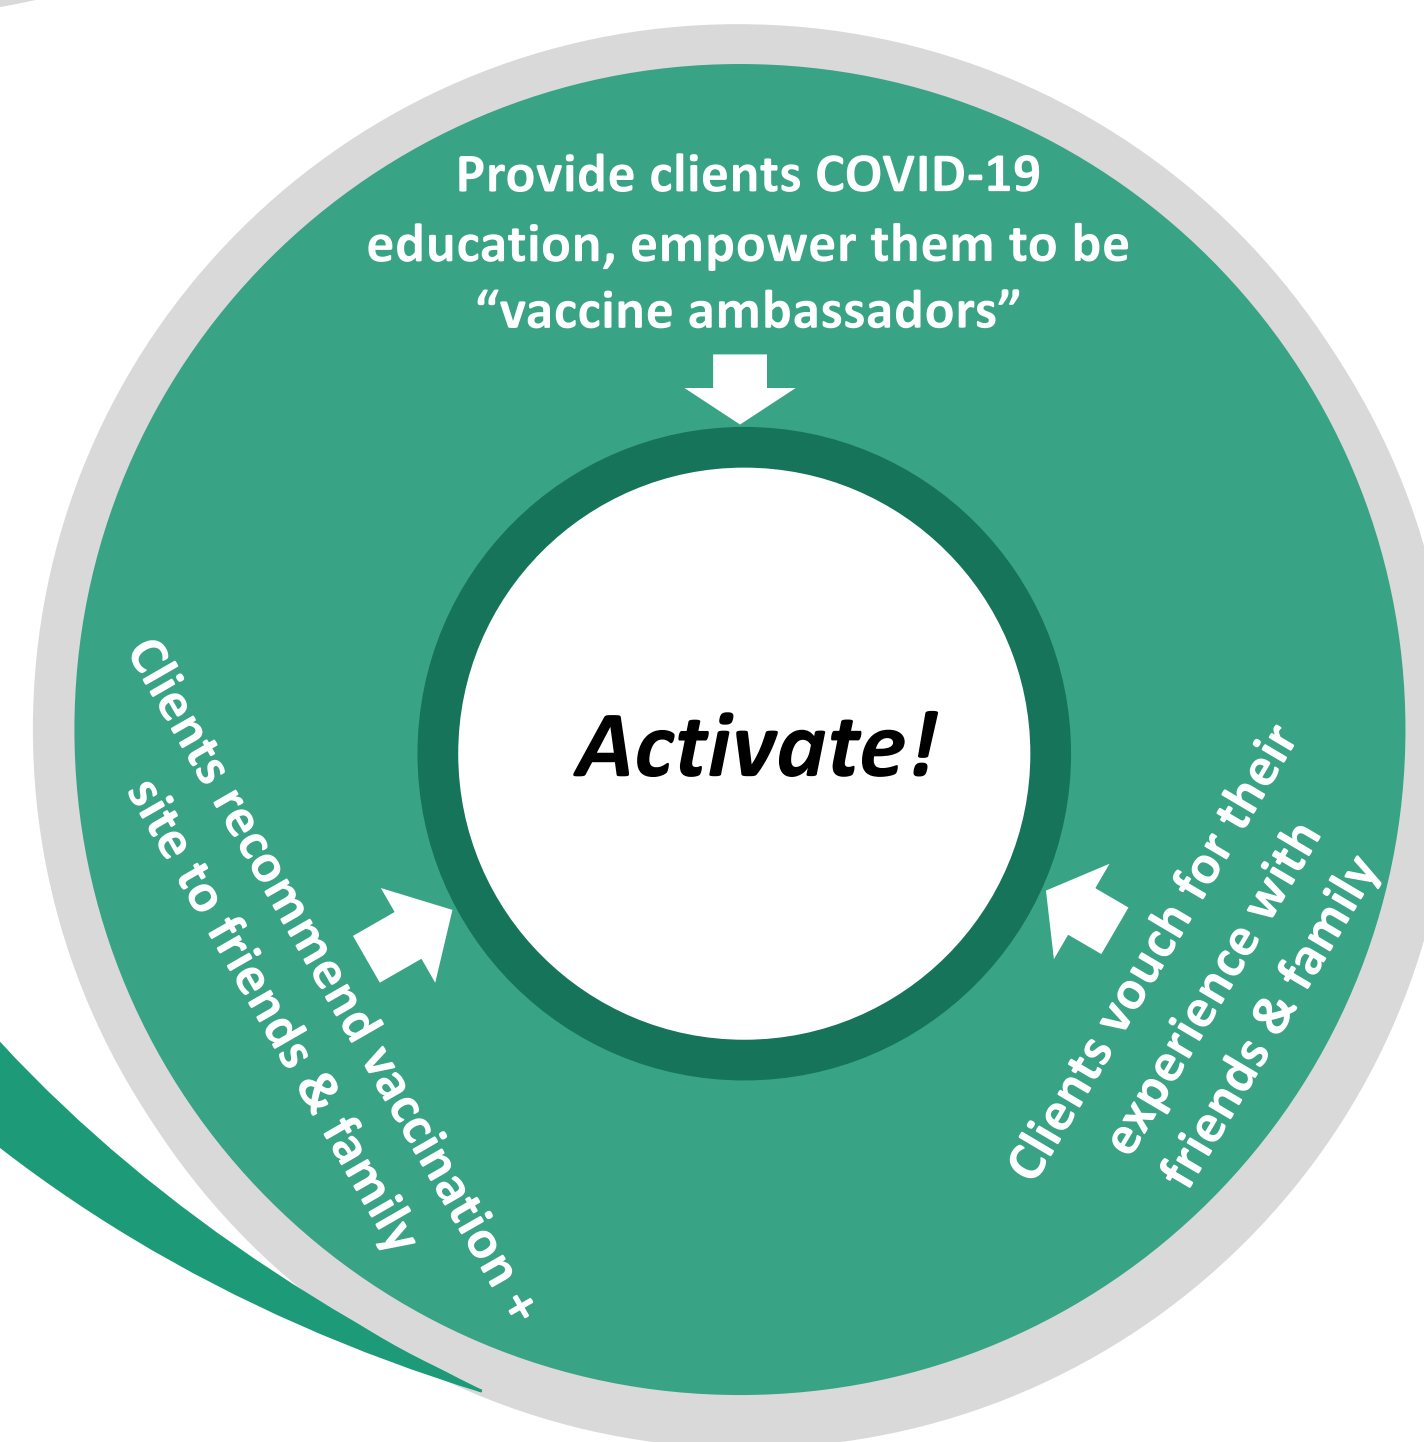

# Figure 2.

## A.

# LET'S CREATE COMMUNITY IMMUNITY

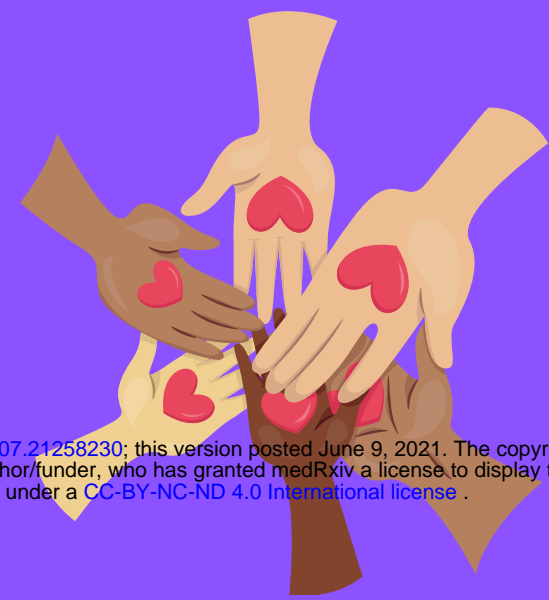

medRxiv preprint doi: <https://doi.org/10.1101/2021.06.07.21258230>; this version posted June 9, 2021. The copyright holder for this preprint (which was not certified by peer review) is the author/funder, who has granted medRxiv a license to display the preprint in perpetuity. It is made available under a CC-BY-NC-ND 4.0 International license.

## FOLLOW SAFETY PROCEDURES-TEST- VACCINATE-TEST

Testing and Vaccine Sunday - Wednesday  
9am-2pm

**VACCINE:**  
Appointment  
needed  
24th and Capp  
street

**Eligible NOW:**  
65+ of age  
Health workers  
IHSS workers  
**Eligible starting 2/24:**  
Food and Agriculture  
workers  
Educators  
Childcare providers

**TESTING:**  
No appointment  
needed  
24th and  
Mission

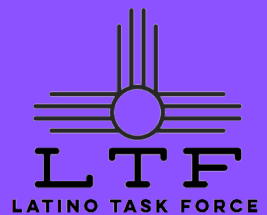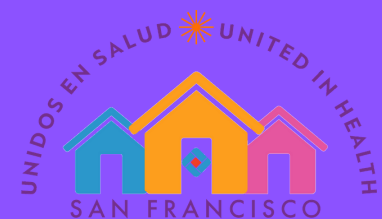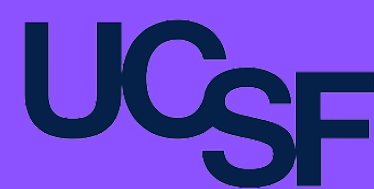

**Figure 3.**

**Ethnic make-up of the Mission District, San Francisco (n=62,452)**

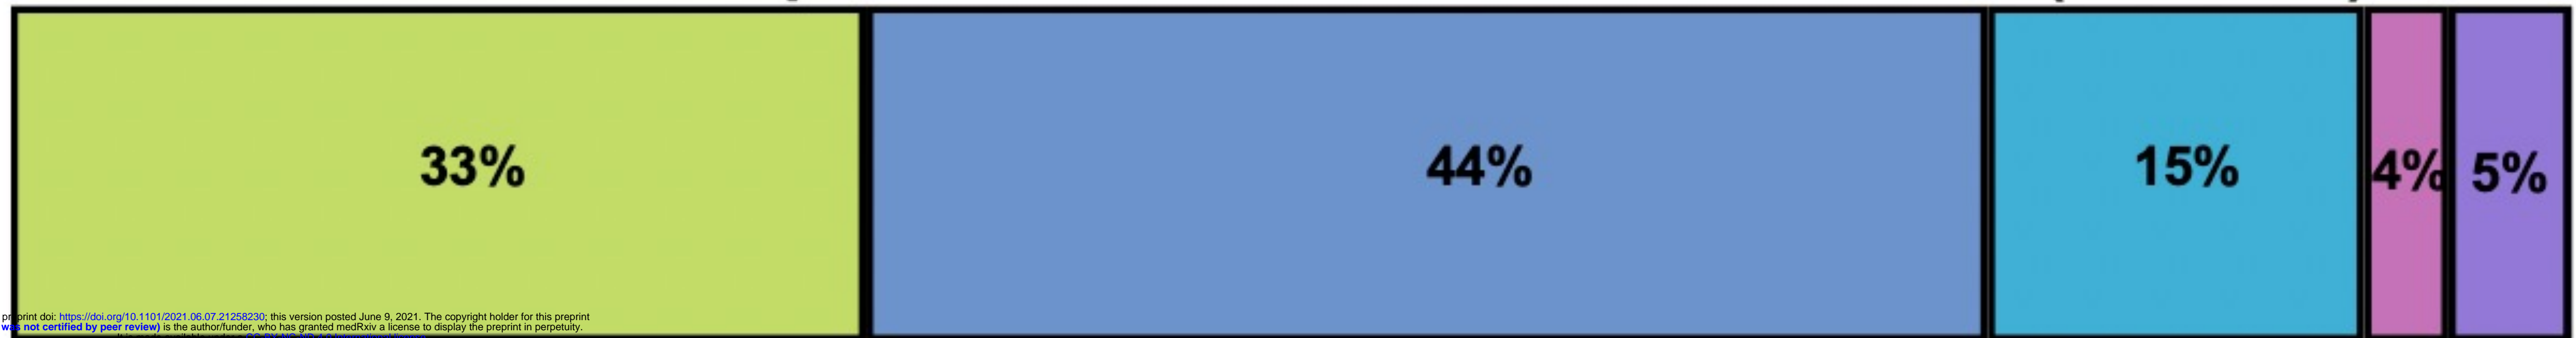

medRxiv preprint doi: <https://doi.org/10.1101/2021.06.07.21258230>; this version posted June 9, 2021. The copyright holder for this preprint (which was not certified by peer review) is the author/funder, who has granted medRxiv a license to display the preprint in perpetuity. It is made available under a CC-BY 4.0 International license.

**Ethnic make-up of clients vaccinated at neighborhood site (n=11,098)**

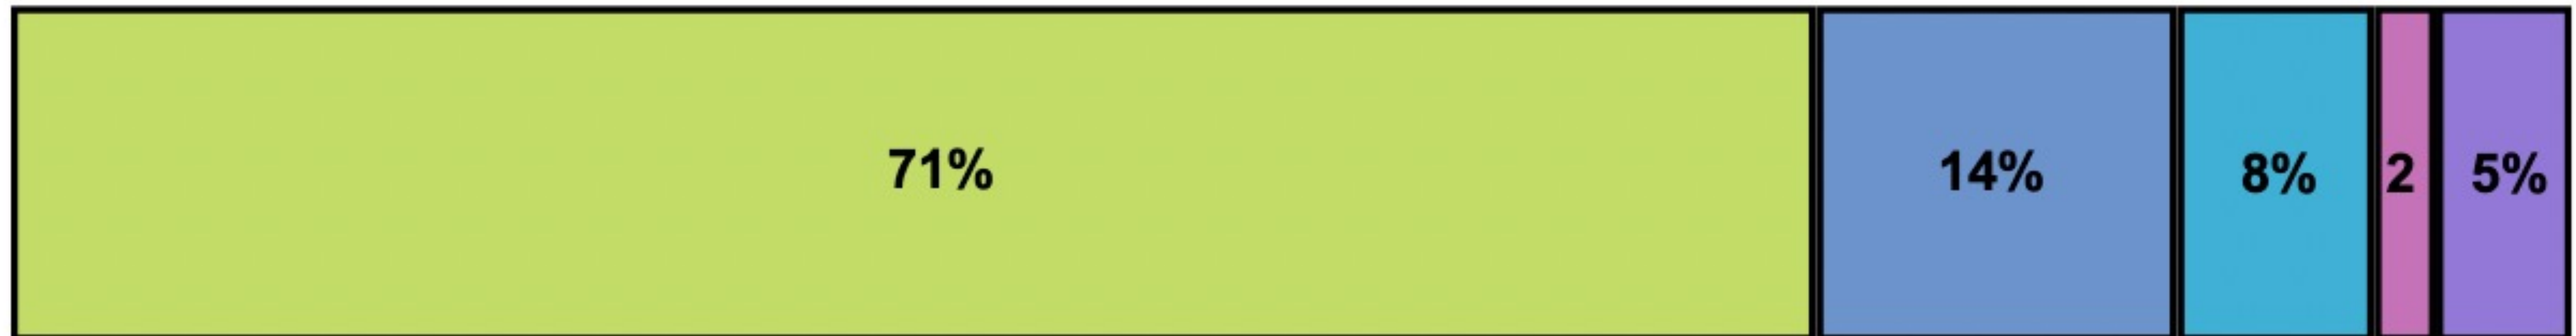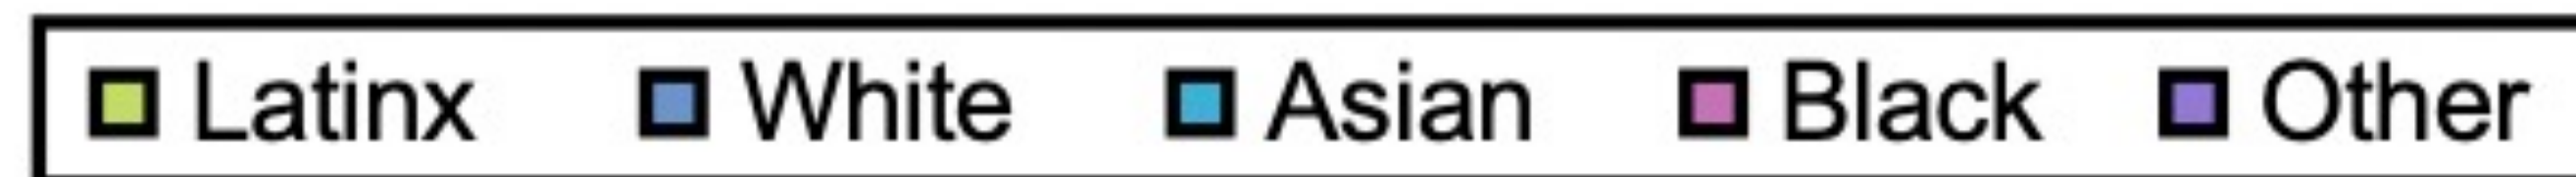



# Figure 4.

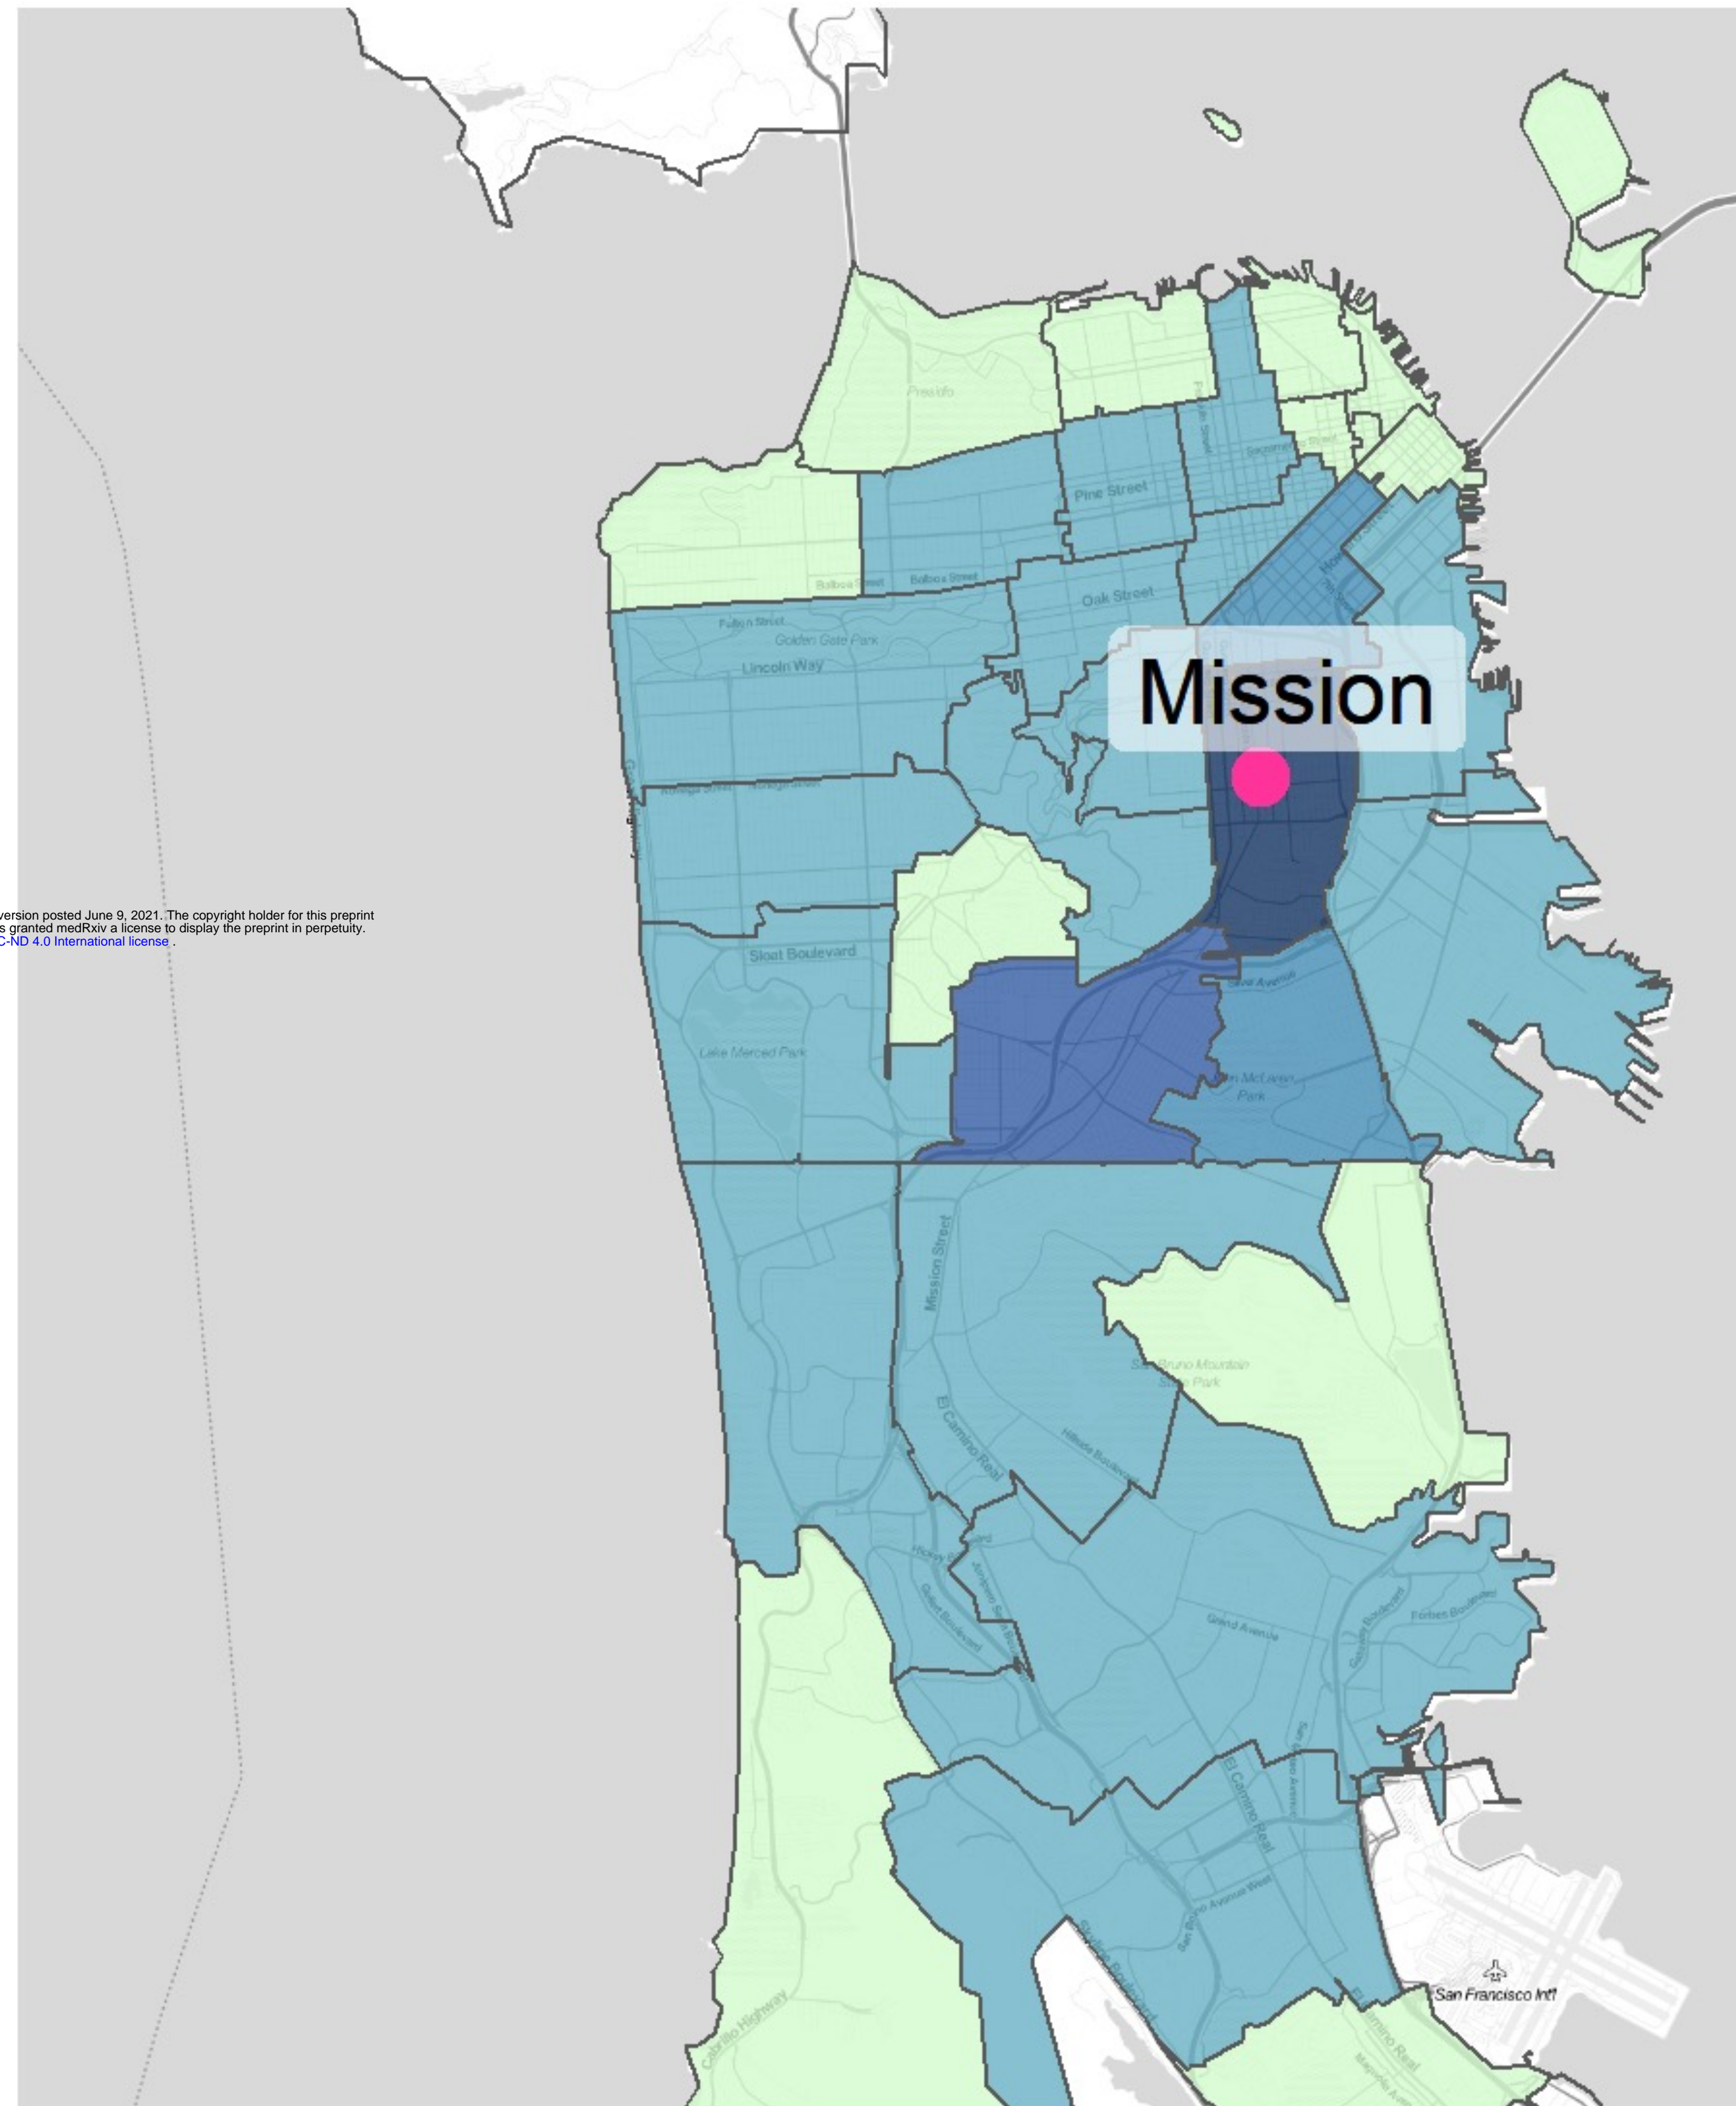

medRxiv preprint doi: <https://doi.org/10.1101/2021.06.07.21258230>; this version posted June 9, 2021. The copyright holder for this preprint (which was not certified by peer review) is the author/funder, who has granted medRxiv a license to display the preprint in perpetuity. It is made available under a [CC-BY-NC-ND 4.0 International license](https://creativecommons.org/licenses/by-nc-nd/4.0/).

## Number vaccinated

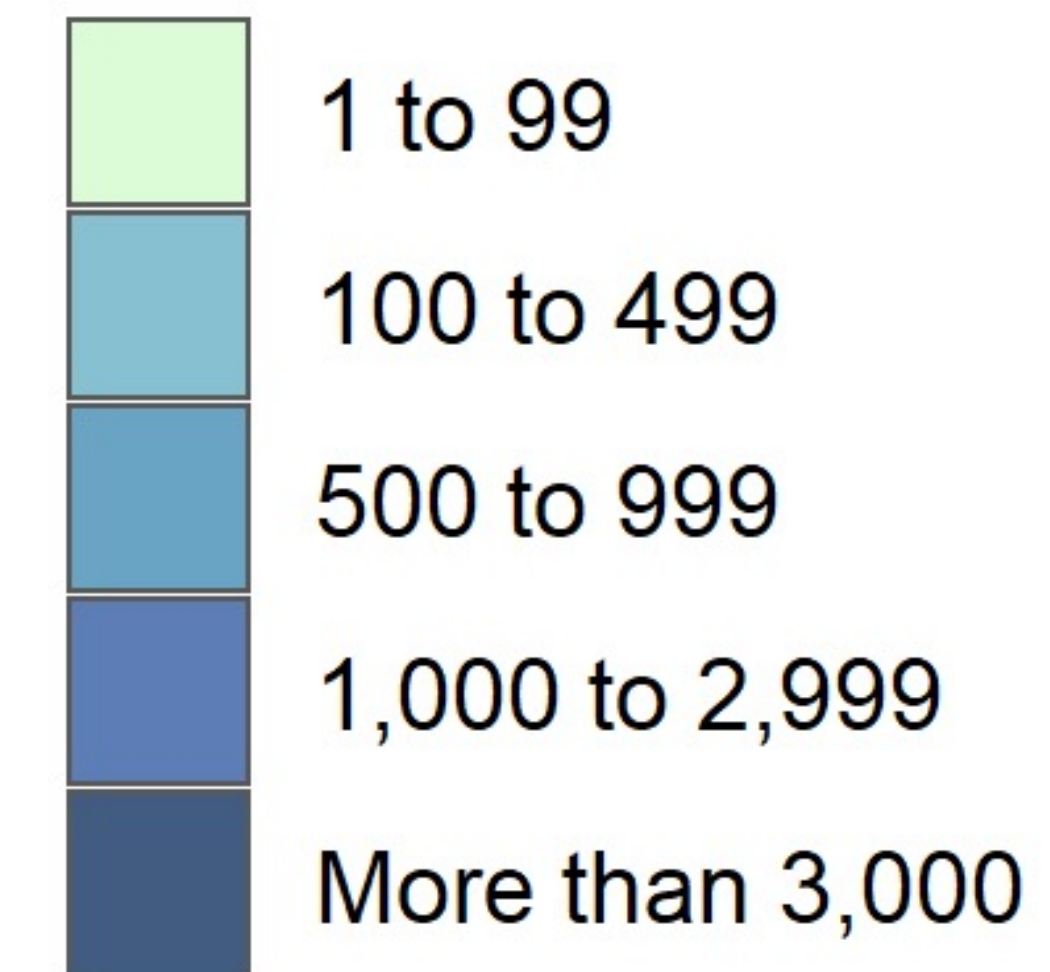



# Figure 5.

## A.

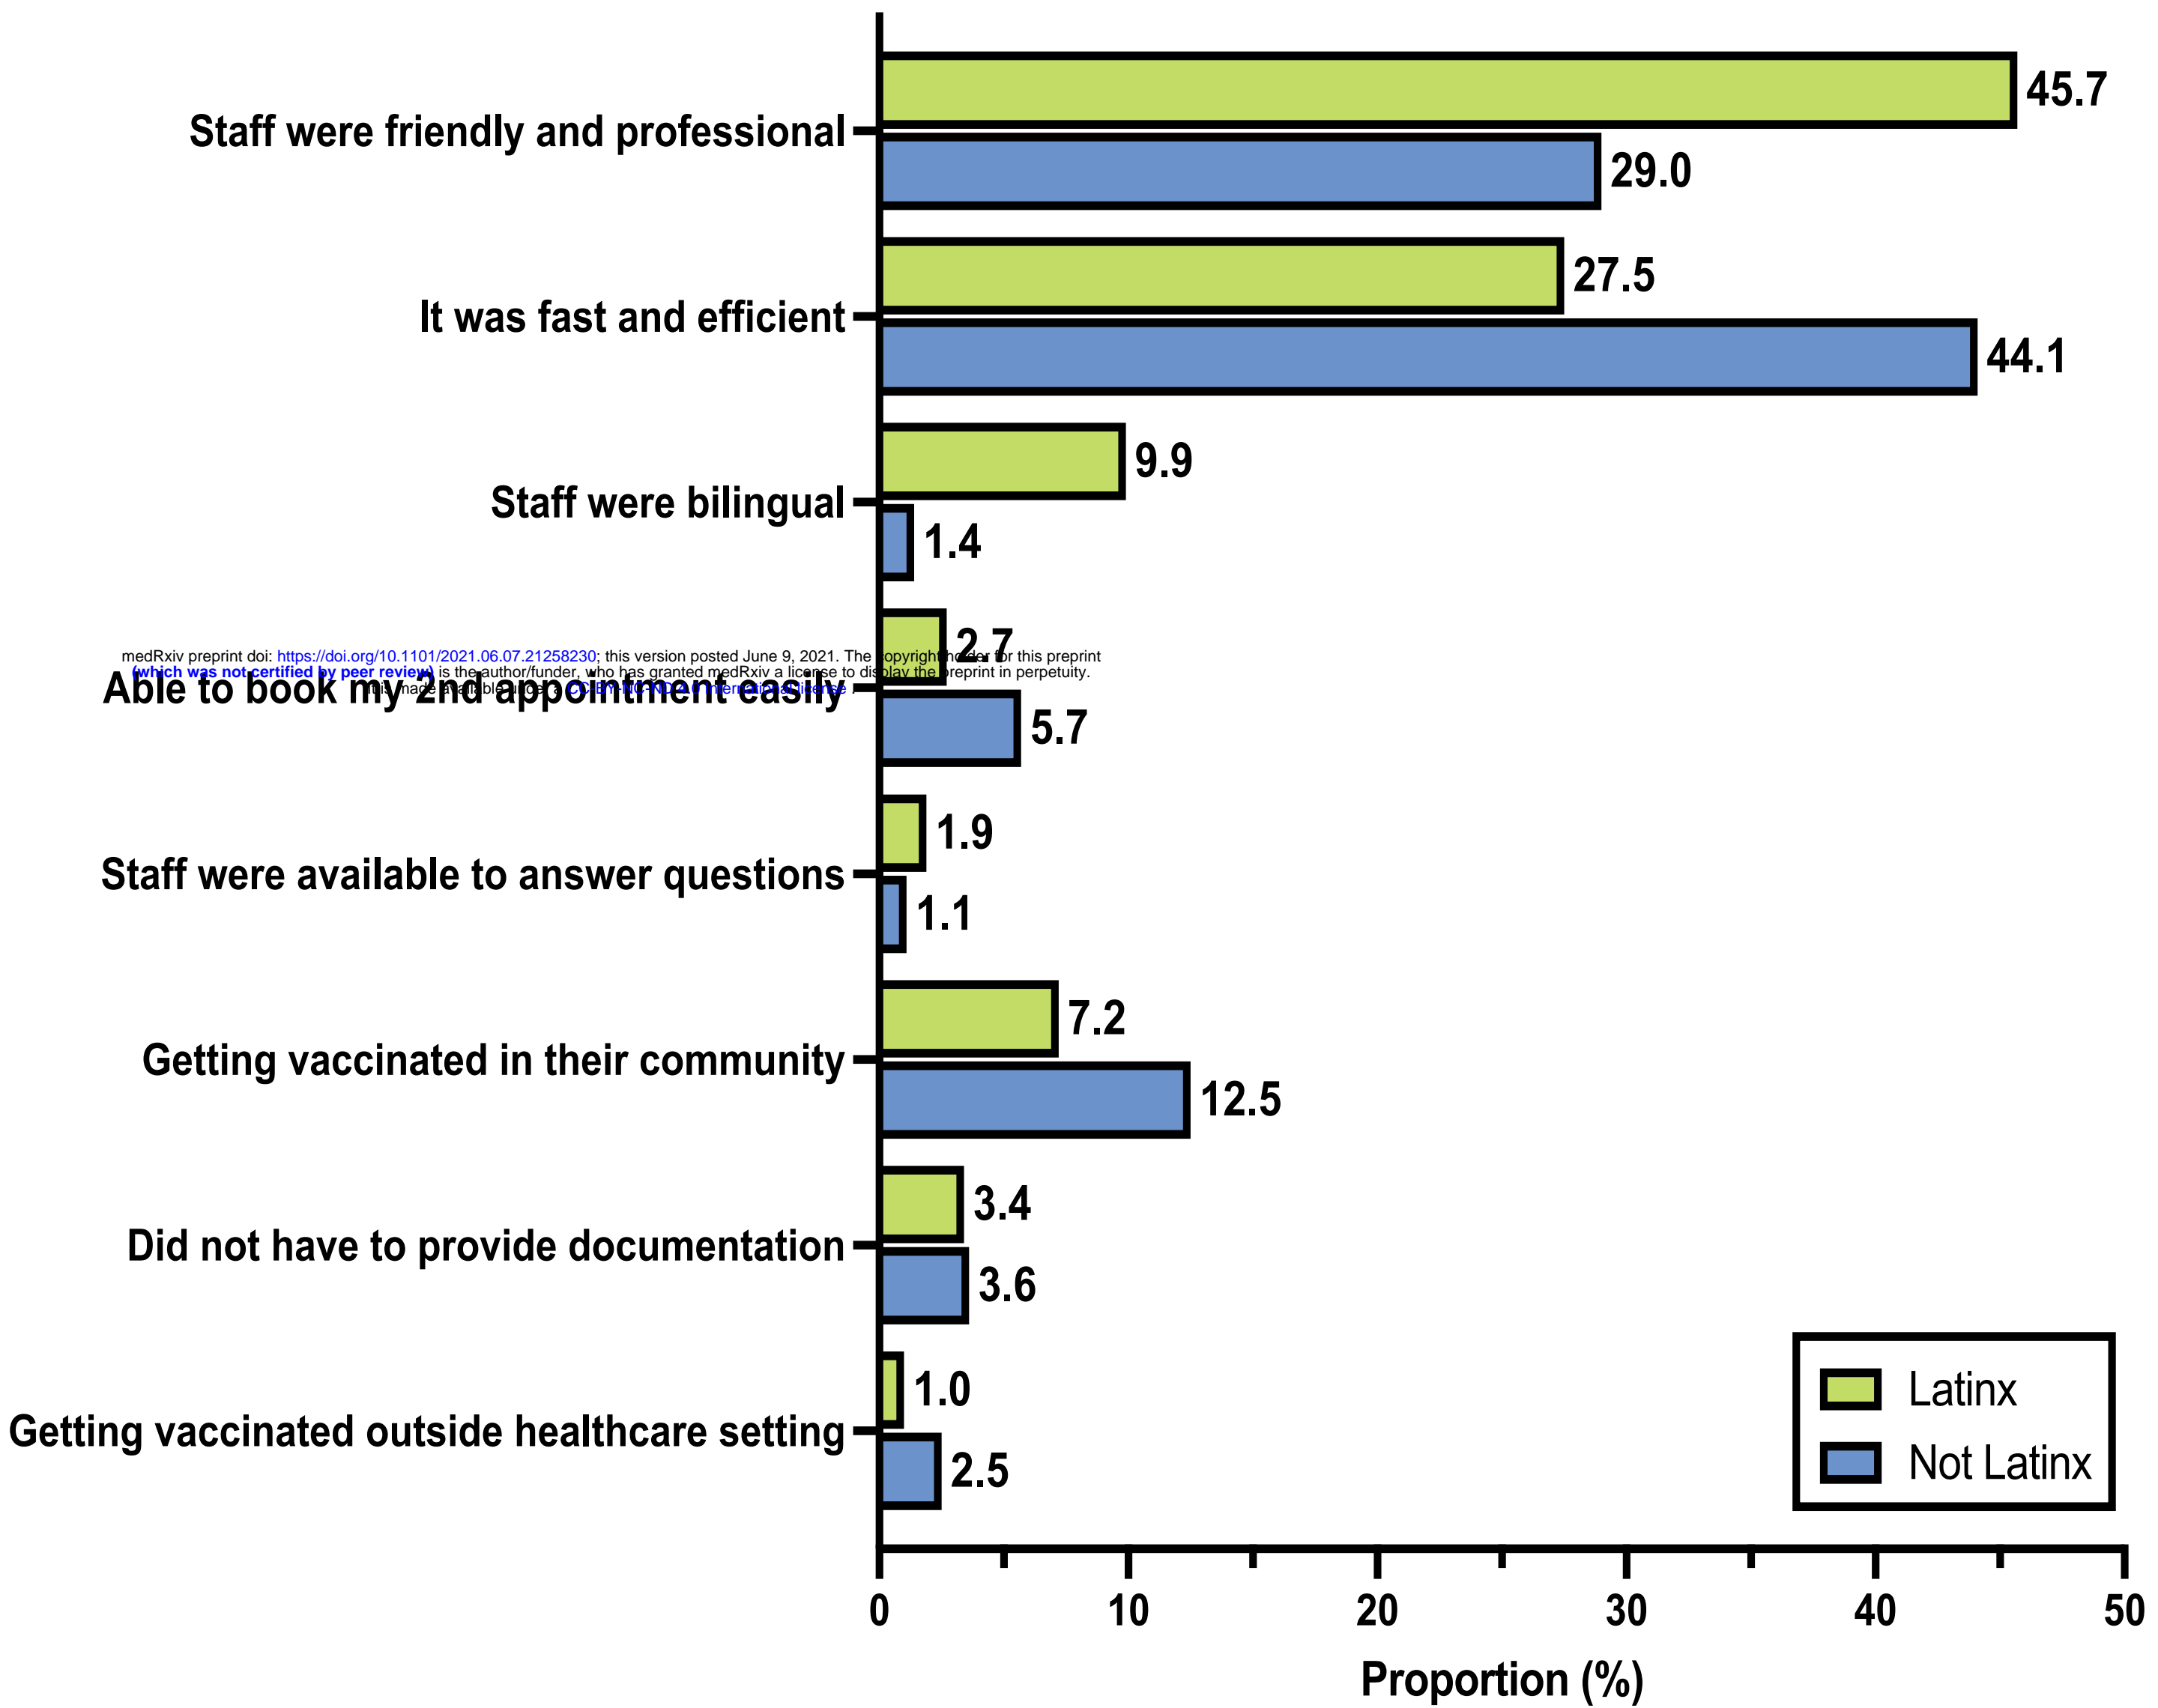

## B.

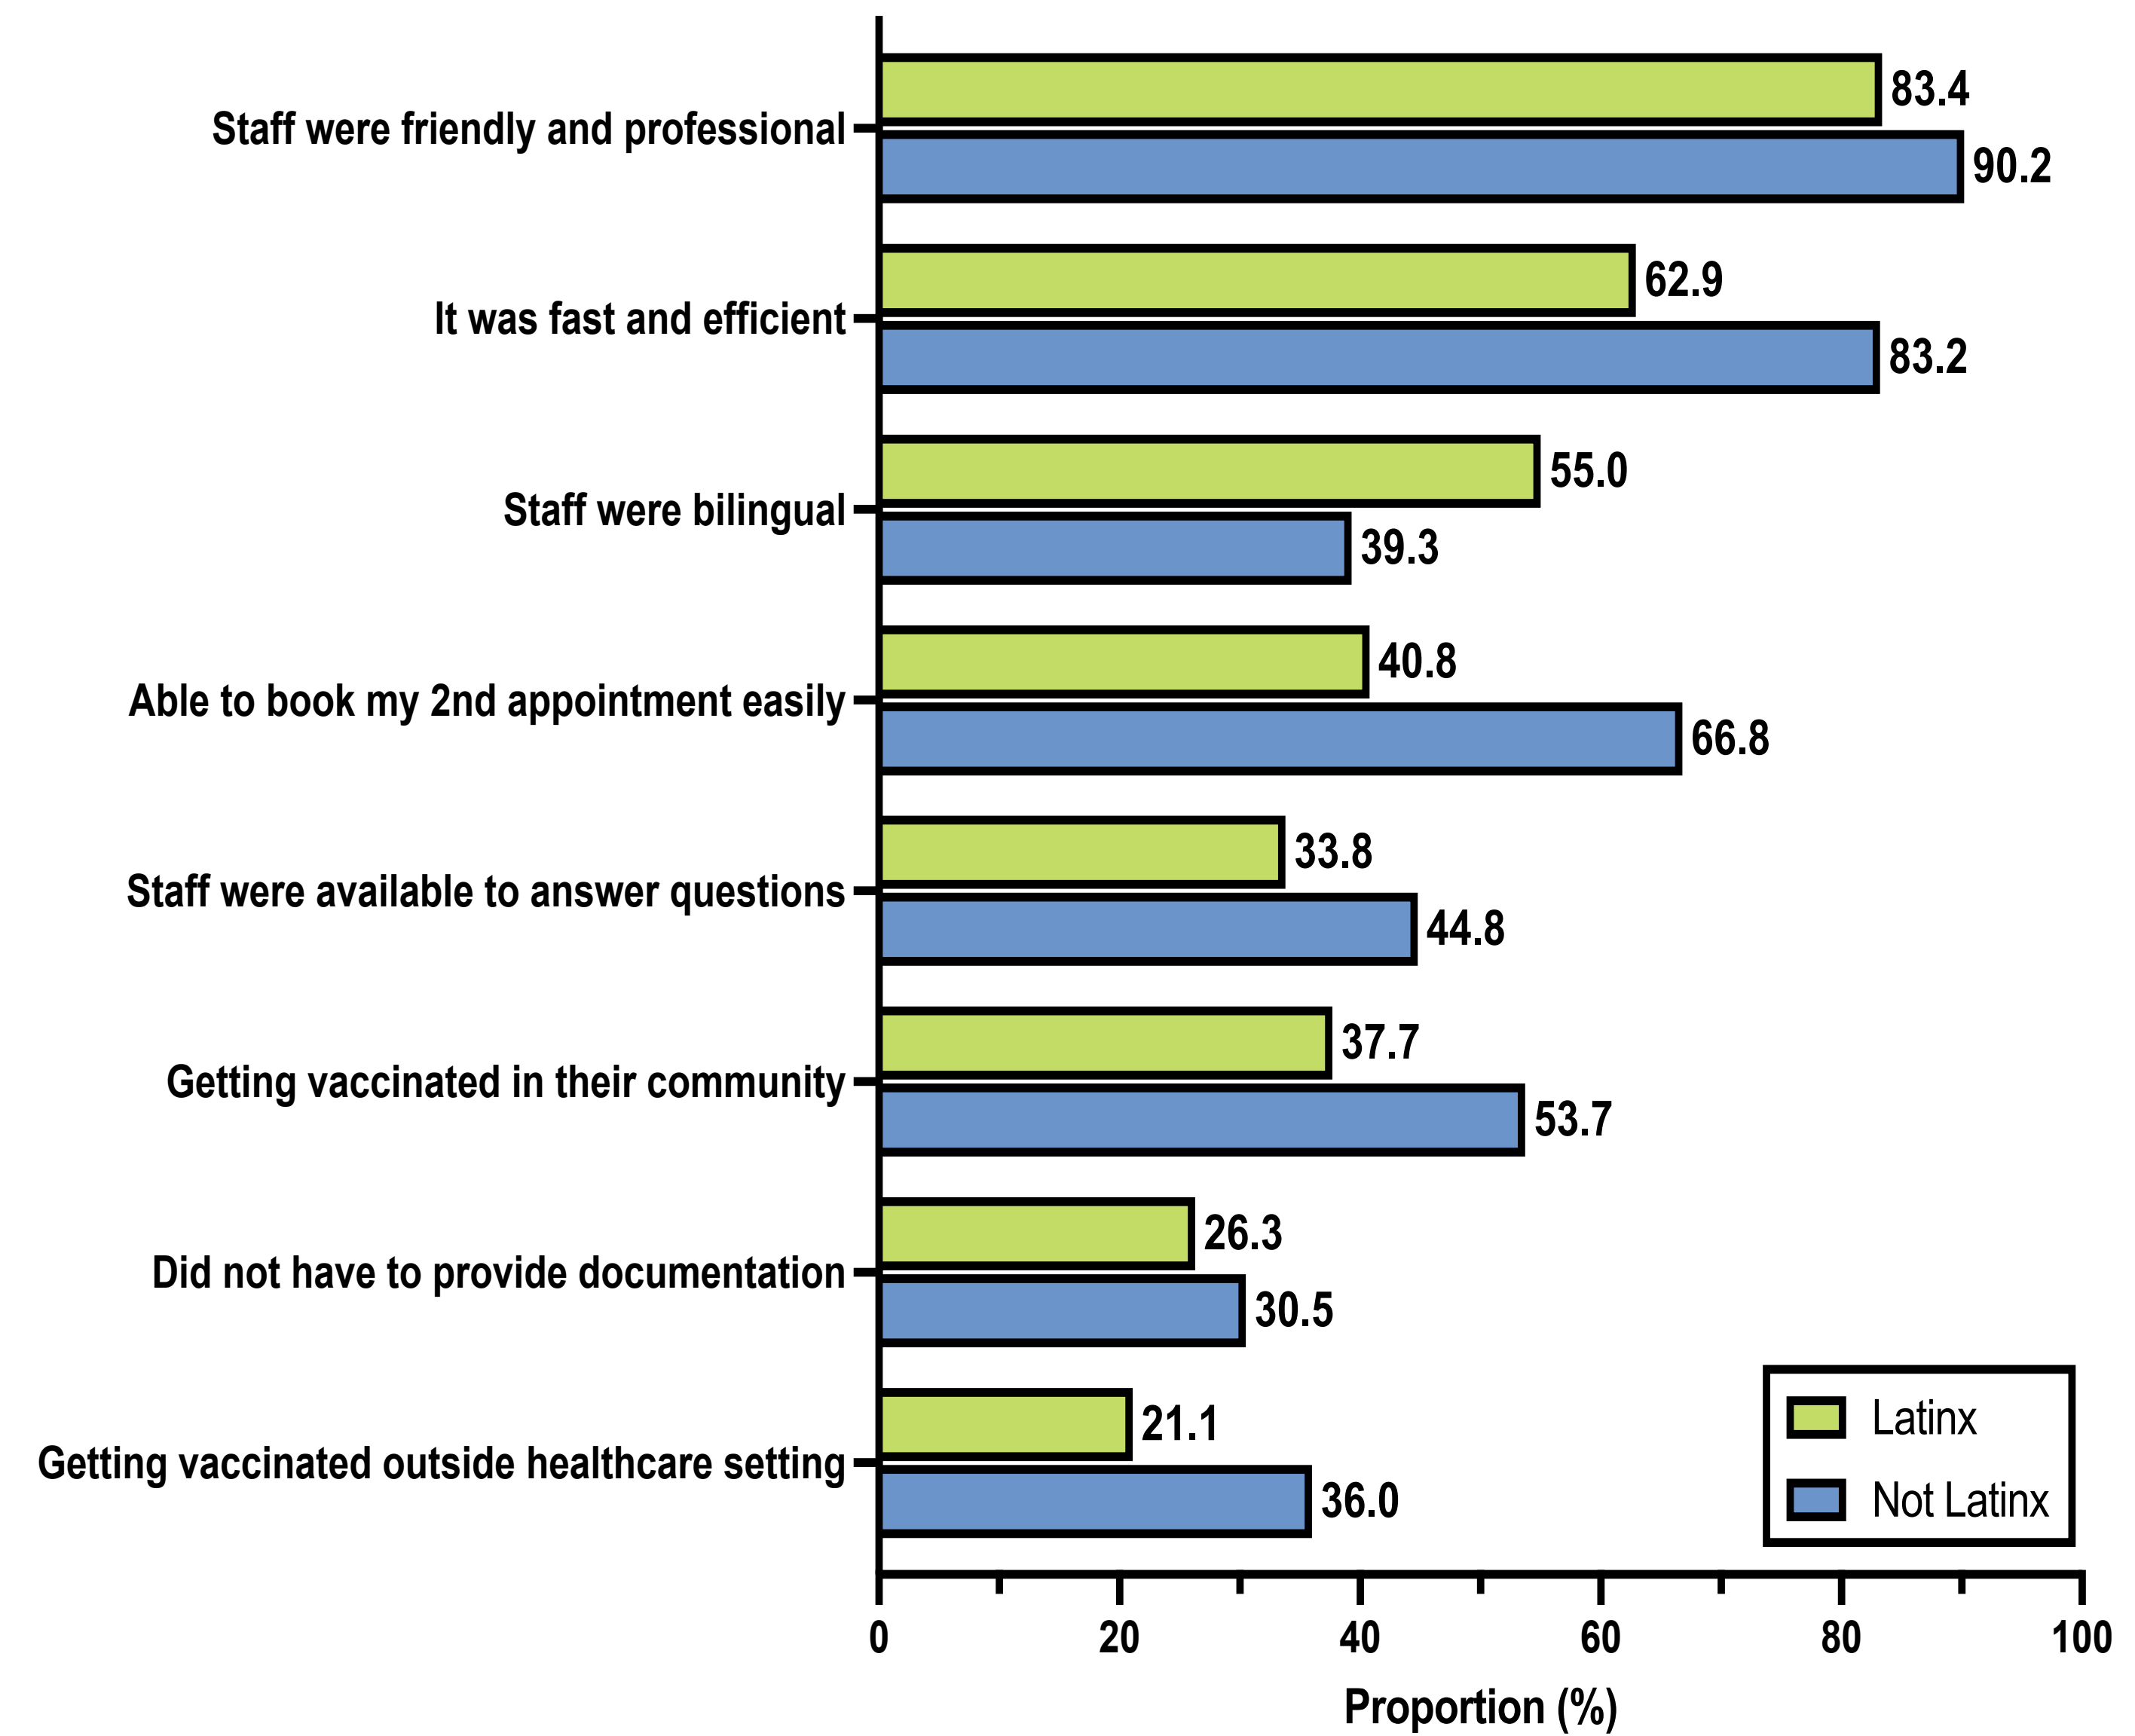

# Figure 6.

## A.

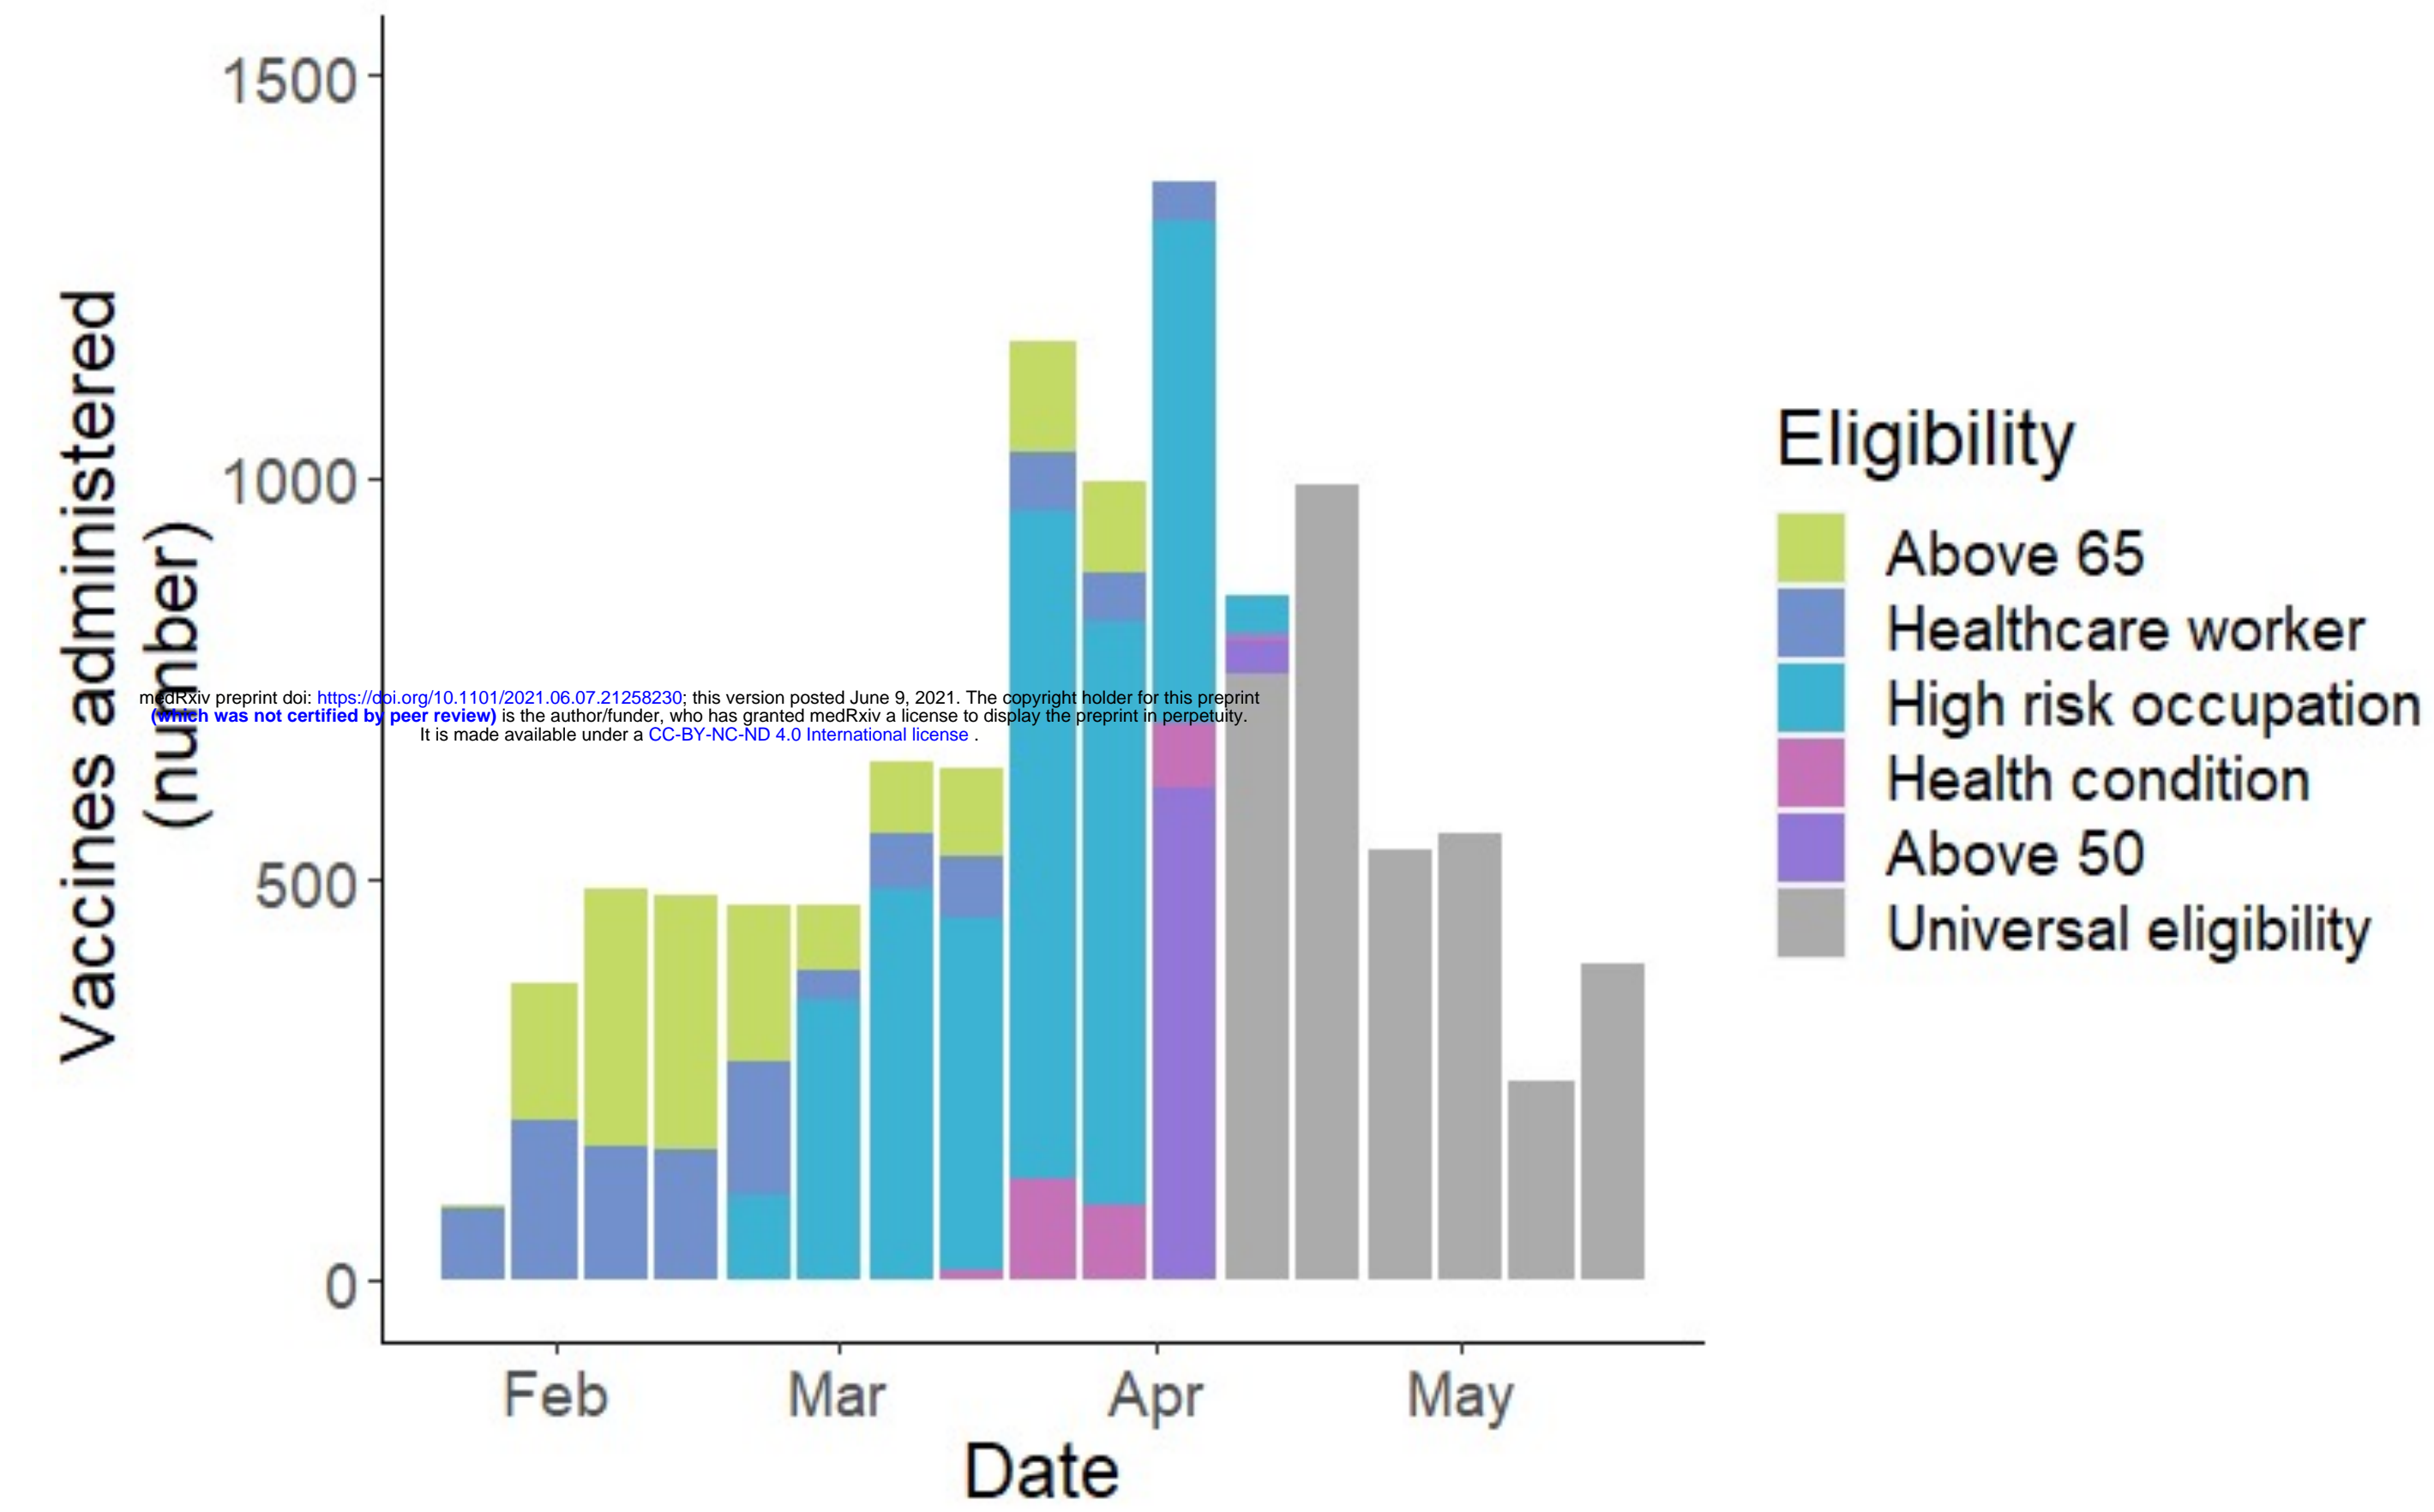

## B.

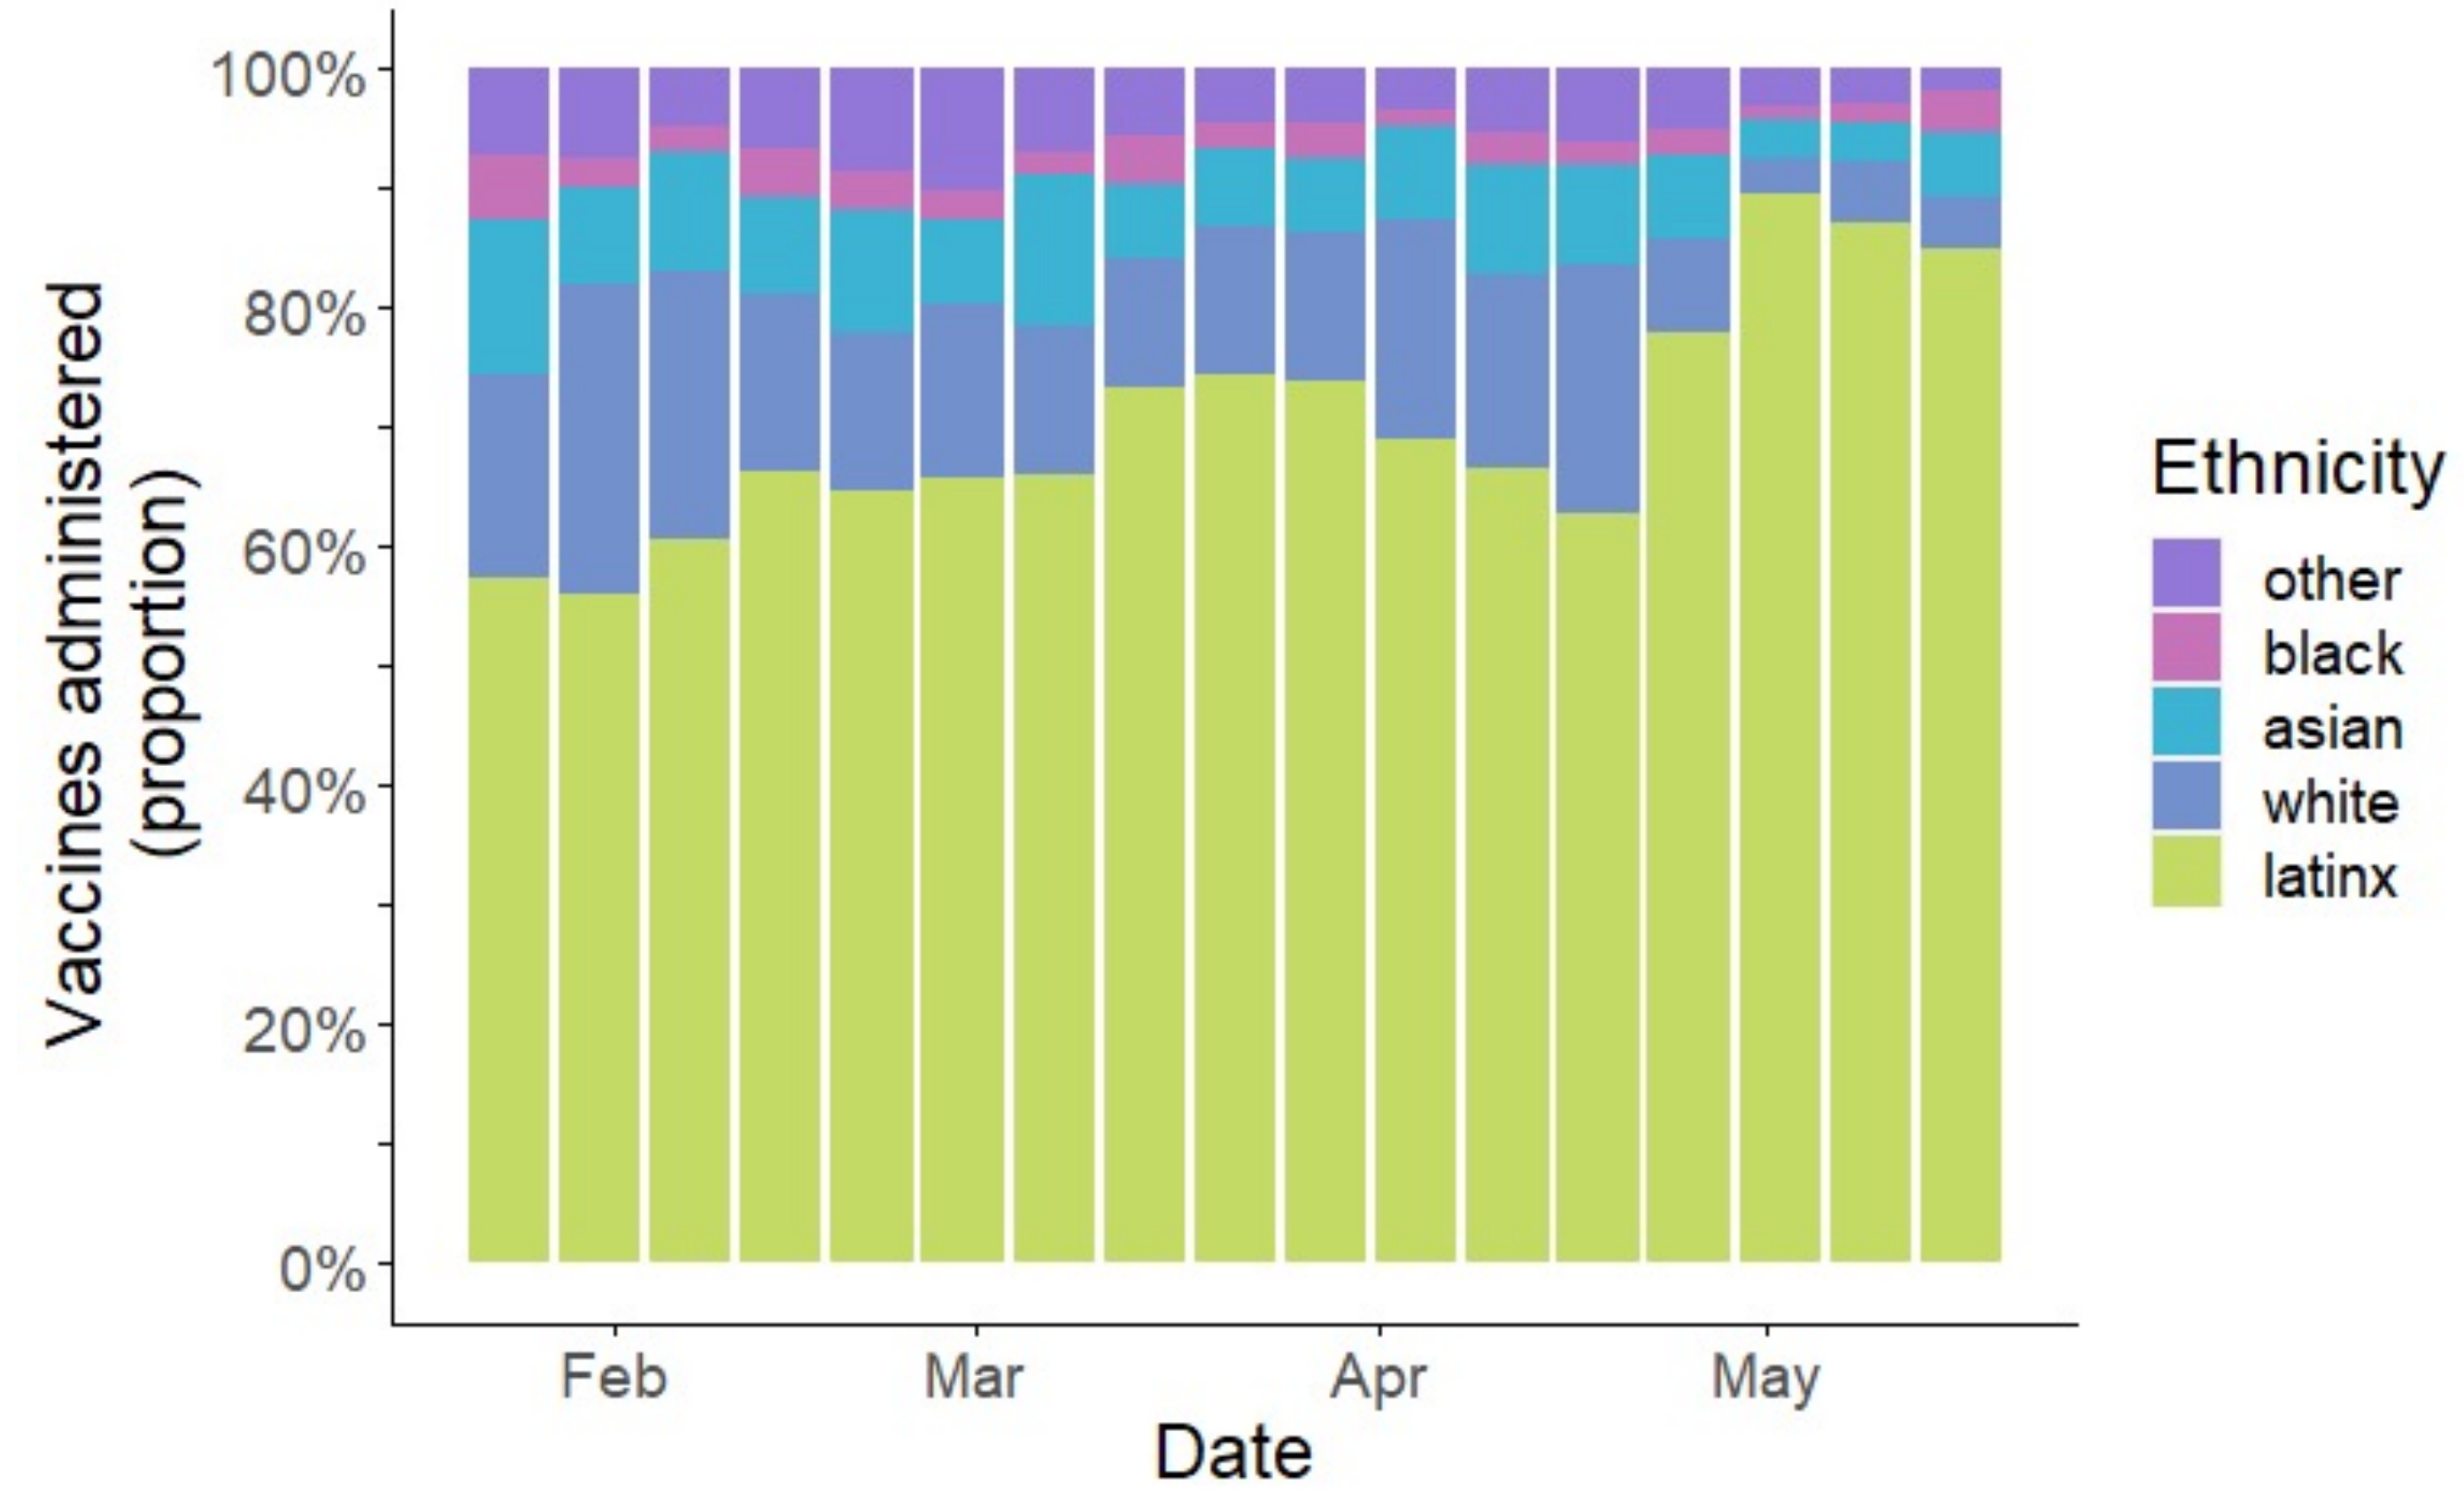



# Supplementary Figure 1.

medRxiv preprint doi: <https://doi.org/10.1101/2021.06.07.21258230>; this version posted June 9, 2021. The copyright holder for this preprint (which was not certified by peer review) is the author/funder, who has granted medRxiv a license to display the preprint in perpetuity. It is made available under a CC-BY-NC-ND 4.0 International license.

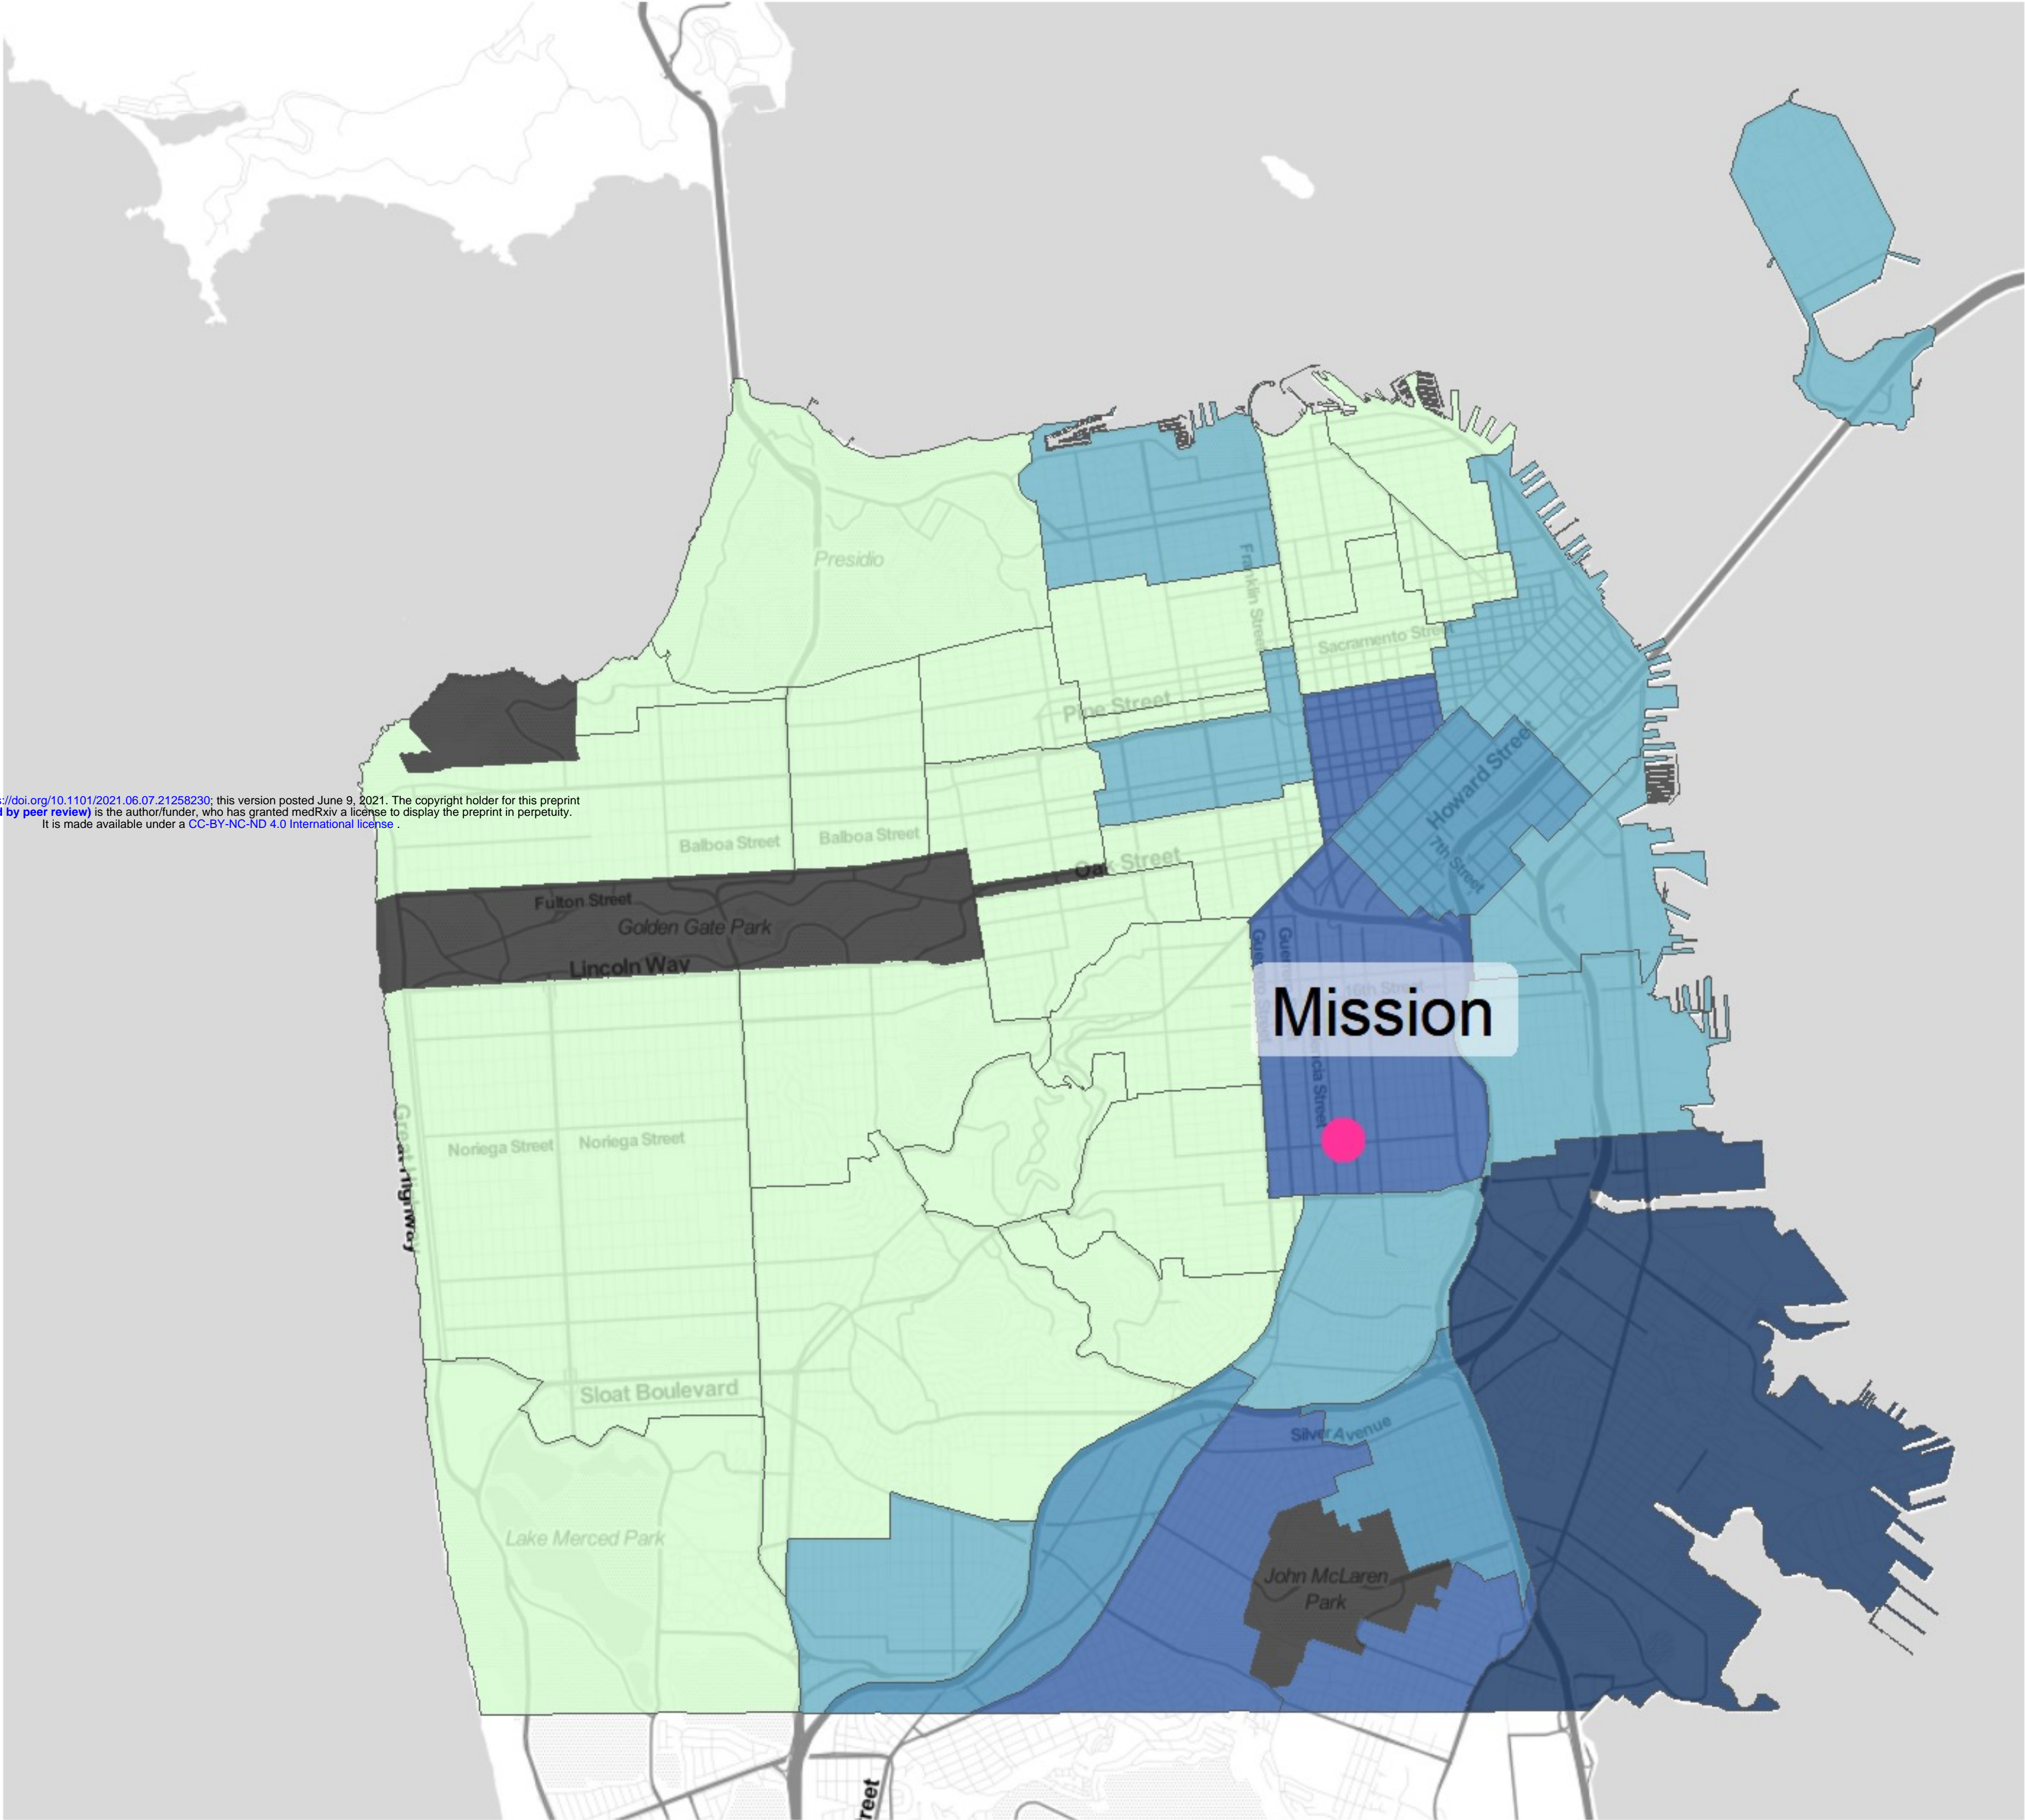

Cumulative cases per 10,000 residents

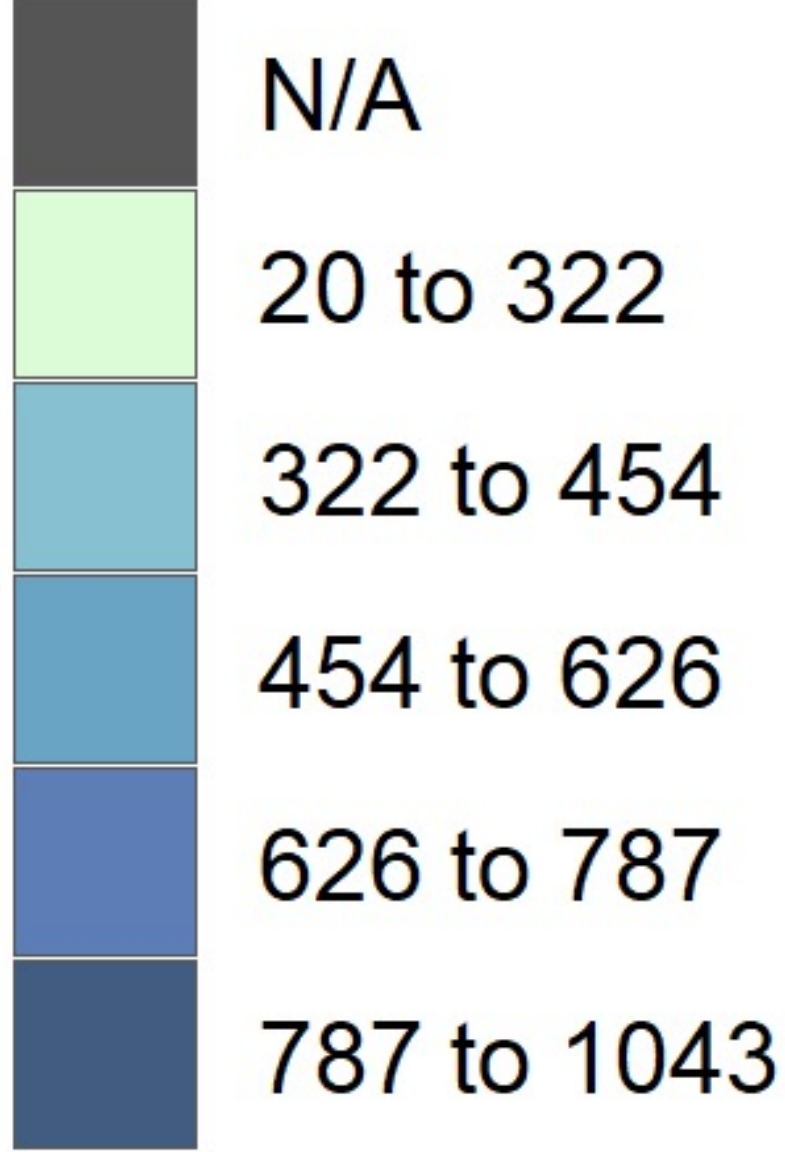

Source: https://medrxiv.org/content/10.1101/2021.06.07.21258230v1.full.pdf
